# Supplementary material for: Transcriptional expression of CAV1 in total and adipose tissue exosomes are associated with poor-quality diet, adiponectinemia, alcoholism, diastolic blood pressure, and cardiovascular risk by Framingham Colombia scale in adults from Cartagena
Source: Research Square preprint supplement (doi:10.21203/rs.3.rs-7458095/v1), 2025-10-20
Supplement: Supplementary file 1 [file a3db3f7083495b697c0772da.docx]

**Supplemental Material**

**Table 1. Sociodemographic characteristics and risk factors for NCDs**

|  | **Total (N=136)** | **Female (n=72)** | **Male (n=64)** | **p-value*** |
| --- | --- | --- | --- | --- |
| Age (years)† | 45 | 49 | 40 | 0,547† |
| E1 (18-29) | 20 (14,7%) | 7 (5,1%) | 13 (9,6%) | 0,157 |
| E2 (30-39) | 30 (22%) | 23 (17%) | 7 (5%) | 0,000 |
| E3 (40-49) | 27 (19,9%) | 10 (7,4%) | 17 (12,5%) | 0,157 |
| E4 (50-59) | 28 (21%) | 18 (13,2%) | 10 (7,8%) | 0,157 |
| E5 (60) | 31 (22,8%) | 8 (5,8%) | 23 (17%) | 0,000 |
| SES 1 Low-low | 40 (29,3%) | 24 (17,6%) | 16 (11,7%) | 0,157 |
| SES 2 Low | 38 (42,7%) | 33 (24,3%) | 25 (18,4%) | 0,157 |
| SES 3 Lower-middle | 32 (23,5%) | 12 (8,8%) | 20 (14,7%) | 0,157 |
| SES 4 Middle | 4 (3%) | 2 (1,5%) | 2 (1,5%) | 0,231 |
| SES 5 Upper-middle | 2 (1,4%) | 1 (0,7%) | 1 (0,7%) | 0,231 |
| PEI | 25 (18,4%) | 20 (14,7%) | 5 (3,7%) | 0,000 |
| SEC | 41 (30,1%) | 27 (19,9%) | 14 (10,2%) | 0,000 |
| TUE | 57 (42%) | 17 (12,6%) | 40 (29,4%) | 0,000 |
| PGE | 13 (9,5%) | 8 (5,8%) | 5 (3,7%) | 0,231 |
| Number of children | 200 (100%) | 136 (68%) | 64 (32%) | 0,000 |
| Smoking | 10 (7,4%) | 1 (0,7%) | 9 (6,7%) | 0,000 |
| Alcohol consumption | 63 (46,3%) | 22 (16,2%) | 41 (30,1%) | 0,000 |
| Physical activity: Yes | 54 (39,7%) | 27 (19,85%) | 27 (19,85%) | 0,231 |
| Physical activity: No | 82 (60,3%) | 45 (33,08%) | 37 (27,2%) | 0,049 |
| Good-diet quality | 10 (7,3%) | 5 (3,65%) | 5 (3,65%) | 0,231 |
| Regular-diet quality | 48 (35,3%) | 26 (19,1%) | 22 (16,2%) | 0,157 |
| Poor-diet quality | 78 (57,4%) | 41 (30,2%) | 37 (27,2%) | 0,157 |

NCDs: Chronic non-communicable diseases. E1-E5: Age group in years. SES: Socioeconomic status. PEI: complete or incomplete primary education. SEC: complete or incomplete secondary education. TUE: Technical, Technological, or University education. PGE: Postgraduate education (specialization, master´s or doctoral degree completion). The number of children included both male and female offspring. † MWU. *Chi-square test. In both tests, p-values <0.05 indicate SSD.

**Table 2. Physical activity (PA)**

| **Classifications** | **Total (n=136)** | **Female (n=72)** | **Male (n=64)** | **p-values** |
| --- | --- | --- | --- | --- |
| **PA: Yes** | 54 (39,7%) | 27 (19,85%) | 27 (19,85%) | 0,231 |
| Vigorous PA (75 min/week) | 20 (14,7%) | 9 (6,6%) | 11 (8,1%) | 0,537 |
| Moderate PA (150 min/week) | 27 (19,85%) | 12 (8,8%) | 15 (11,05%) | 0,428 |
| Mixed PA | 7 (5,14%) | 6 (4,4%) | 1 (0,74%) | 0,041 |
| Average sedentary hours per day* | 4,41 | 3,74 | 5,09 | 0,049 |
| **PA: No** | 82 (60,3%) | 45 (33,08%) | 37 (27,2%) | 0,049 |
| None PA | 37 (27,2%) | 21 (15,44%) | 16 (11,76%) | 0,348 |
| Irregular or Sporadic PA | 45 (33,08%) | 24 (17,64%) | 21 (15,44%) | 0,348 |
| Average sedentary hours per day* | 5,84 | 4,48 | 7,48 | 0,049 |

Mixed PA: combination of moderate and vigorous PA. *Not including night-time sleep hours. Chi-square test, p-values <0,05 indicate SSD. Own elaboration.

**Table 3. Anthropometry by sex**

|  | **Total (n=136)** | **Female (n=72)** | **Male (n=64)** | **p-value** |
| --- | --- | --- | --- | --- |
| Age (years) b | 42 | 54 | 38 | 0,000 |
| Weight (Kg) a | 77,4 | 67,78 | 88,47 | 0,000 |
| Height (cm) b | 164 | 156,5 | 173 | 0,000 |
| BMI (Kg/mt2) a | 28,3 | 27,3 | 29,4 | 0,057 |
| SBP (mm Hg) b | 120 | 120 | 113,5 | 0,750 |
| DBP (mm Hg) b | 70 | 70 | 70 | 0,550 |
| WC (cm) b | 92,5 | 88,75 | 95,75 | 0,000 |
| HC (cm) b | 100 | 100,50 | 100 | 0,439 |
| WHR b | 0,92 | 0,86 | 0,97 | 0,000 |
| WHtR b | 0,56 | 0,55 | 0,55 | 0,534 |
| HC/TG a | 0,814 | 0,88 | 0,75 | 0,002 |
| TG/HC b | 0,085 | 0,07 | 0,12 | 0,006 |

SBP: Systolic Blood Pressure, DBP: Diastolic Blood Pressure, BMI: Body Mass Index, WC: Waist Circumference, HC: Hip Circumference, WHR: Waist-to-Hip Ratio, WHtR: Waist-to-Height Ratio. TG: Triglycerides. a Unpaired Student's t-test. b MWU test. In both tests, p-values <0.05 indicate SSD. Own elaboration.

**Table 4. Anthropometric differences by BMI**

|  | **Normal-weight (n=45)1** | **Overweight (n=42)2** | **Obesity (n=49)3** | **p-values** |
| --- | --- | --- | --- | --- |
| WC (cm) b | 79 | 92 | 106,5 | 0,0001,2,3 |
| HC (cm) b | 90 | 100 | 114 | 0,0001,2,3 |
| WHR b | 0,88 | 0,91 | 0,96 | 0,0001,3  0,0821,2  0,0792,3 |
| WHtR b | 0,5 | 0,55 | 0,64 | 0,0001,2,3 |
| HC/TG a | 0,78 | 0,80 | 0,86 | >0,051,2,3 |
| TG/HC b | 1,27 | 1,25 | 1,20 | >0,051,2,3 |

WC: Waist Circumference, HC: Hip Circumference, WHR: Waist-to-Hip Ratio, WHtR: Waist-to-Height Ratio. TG: Triglycerides. a One-way ANOVA, Levene's test for homogeneity of variances and multiple comparisons with Bonferroni and Tukey´s corrections. b KWH for K-independent samples and Bonferroni correction. In both tests, p-values <0,05 indicate SSD. Own elaboration.

### Table 5. Anthropometric differences by obesity type

|  | **Type I Obesity (n=28) 1** | **Type II Obesity (n=15) 2** | **Type III Obesity (n=6) 3** | **p-values** |
| --- | --- | --- | --- | --- |
| WC (cm) b | 101 | 113 | 126 | 0,0021,2  0,0001,3  0,0412,3 |
| HC (cm) b | 110,5 | 118 | 137,5 | 0,0061,2  0,0001,3  0,0242,3 |
| WHR b | 0,94 | 1,00 | 0,95 | 0,426 |
| WHtR b | 0,61 | 0,67 | 0,77 | 0,0021,2  0,0001,3  0,0492,3 |
| HC/TG a | 0,81 | 0,90 | 1,00 | >0,051,2,3 |
| TG/HC b | 1,22 | 1,18 | 1,06 | >0,051,2,3 |

WC: Waist Circumference, HC: Hip Circumference, WHR: Waist-to-Hip Ratio, WHtR: Waist-to-Height Ratio. TG: Triglycerides. a One-way ANOVA, Levene's test for homogeneity of variances and multiple comparisons with Bonferroni and Tukey´s corrections. b KWH for K-independent samples and Bonferroni correction. In both tests, p-values <0,05 indicate SSD. Own elaboration.

**Table 6. Differences for age, blood pressure, and blood biochemistry by BMI**

|  | **Normal-weight (n=45)1** | **Overweight**  **(n=42)2** | **Obesity (n=49)3** | **p-values** |
| --- | --- | --- | --- | --- |
| Age (years)b | 54 | 41 | 41 | 0,109 |
| SBP (mm Hg)b | 120 | 116 | 120 | 0,747 |
| DBP (mm Hg)b | 70 | 70 | 70 | 0,313 |
| Glycaemia (mg/dL)a | 93,21 | 97,49 | 103,40 | 0,0441,3 |
| Insulin (μU/mL)b | 6,41 | 10,7 | 13,85 | 0,0001,3  0,0021,2  0,0092,3 |
| HOMA-IR b | 1,56 | 2,38 | 3,75 | 0,0001,3  0,0021,2  0,0032,3 |
| Adiponectin (μg/mL) a | 25,10 | 24,28 | 22,70 | 0,066 |
| C-reactive Protein (mg/dL) a | 1,33 | 3,14 | 7,95 | 0,0151,3 |
| Triglycerides, TG (mg/dL) b | 111,87 | 127,85 | 134,70 | 0,0061,3 |
| Total Cholesterol, TC (mg/dL) b | 187,50 | 201,87 | 206,25 | 0,0031,3 |
| HDL (mg/dL) b | 35,26 | 35,32 | 31,93 | 0,126 |
| LDL (mg/dL) a | 118,16 | 125,30 | 131,13 | 0,404 |
| VLDL (mg/dL) b | 22,37 | 25,57 | 26,94 | 0,0061,3 |
| TC/HDL a | 5,23 | 5,69 | 6,56 | 0,0051,3  0,8631,2  0,1282,3 |
| TG/HDL b | 2,98 | 3,64 | 4,45 | 0,0081,3  0,4921,2  0,3772,3 |
| LDL/HDL b | 2,84 | 3,30 | 3,87 | 0,109 |
| (TC-HDL) b | 143,18 | 167,07 | 174,67 | 0,0061,3  0,1931,2  0,7432,3 |
| (TC-HDL)/HDL a | 4,23 | 4,69 | 5,56 | 0,0051,3  0,8631,2  0,1282,3 |

Tables 5 and 6. a One-way ANOVA, Levene's test for homogeneity of variances and multiple comparisons with Bonferroni and Tukey´s corrections. b KWH test for K-independent samples and Bonferroni correction. In both tests, p-values <0.05 indicate SSD. Own elaboration.

**Table 7. Anthropometric and blood biochemical differences by obesity type**

|  | **Type I Obesity (n=28)1** | **Type II Obesity**  **(n=15)2** | **Type III Obesity**  **(n=6)3** | **p-values** |
| --- | --- | --- | --- | --- |
| Age (years) b | 41,5 | 40 | 40,5 | 0,790 |
| SBP (mm Hg) b | 120 | 120 | 122,5 | 0,146 |
| DBP (mm Hg) b | 70 | 70 | 80 | 0,145 |
| Weight (Kg) a | 89,12 | 104,96 | 121,05 | 0,0011,2  0,0001,3  0,0312,3 |
| Height (cm) b | 166 | 167,5 | 166,5 | 0,804 |
| BMI (Kg/mt2) a | 31,08 | 36,87 | 44,71 | 0,0001,2,3 |
| Glycaemia (mg/dL) a | 105,24 | 101,41 | 99,75 | 0,703 |
| Insulin (μU/mL) b | 11,05 | 16,09 | 19,84 | 0,253 |
| HOMA-IR b | 3,11 | 3,98 | 3,88 | 0,400 |
| Adiponectin (μg/mL) a | 22,60 | 22,74 | 23,09 | 0,968 |
| C-reactive Protein (mg/dL) a | 6,64 | 11,60 | 5,00 | 0,568 |
| Triglycerides, TG (mg/dL) b | 134,70 | 137,96 | 142,46 | 0,894 |
| Total Cholesterol, TC (mg/dL) b | 205,41 | 208,58 | 236,66 | 0,167 |
| HDL (mg/dL) b | 32,51 | 31,93 | 28,86 | 0,626 |
| LDL (mg/dL) a | 126,81 | 136,75 | 137,29 | 0,867 |
| VLDL (mg/dL) b | 26,94 | 26,39 | 28,49 | 0,894 |
| TC/HDL a | 6,24 | 6,86 | 7,28 | 0,941 |
| TG/HDL b | 4,06 | 4,45 | 4,71 | 0,985 |
| LDL/HDL b | 3,78 | 3,87 | 4,21 | 0,863 |
| (TC-HDL) b | 173,46 | 171,63 | 200,99 | 0,0432,3 |
| (TC-HDL)/HDL a | 5,24 | 5,86 | 6,28 | 0,533 |

a One-way ANOVA, Levene's test for homogeneity of variances and multiple comparisons with Bonferroni and Tukey´s corrections. b KWH for K-independent samples and Bonferroni correction. In both tests, p-values <0.05 indicate SSD. Own elaboration.

**Table 8. Nutritional habits by sex**

|  | **Total: n, (%)** | **Female: n, (%)** | **Male: n, (%)** | **p-values** |
| --- | --- | --- | --- | --- |
| **Has a set meal schedule** | | | | |
| Yes | 74 (54,41%) | 33 (24,26%) | 41 (30,14%) | <0,05 |
| No | 62 (45,59%) | 39 (28,67%) | 23 (16,92%) | <0,05 |
| **Follows the set meal schedule** | | | | |
| Yes | 59 (43,38%) | 24 (17,64%) | 35 (25,74%) | <0,05 |
| No | 15 (11%) | 9 (6,6%) | 6 (4,4%) | >0,05 |
| **Number of meals per day** | | | | |
| 1 | 2 (1,5%) | 2 (1,5%) | 0 (0%) | >0,05 |
| 2 | 32 (23,53%) | 21 (15,44%) | 11 (8,09%) | <0,05 |
| 3 | 97 (71,32%) | 47 (34,55%) | 50 (36,77%) | >0,05 |
| 4 | 5 (3,7%) | 2 (1,5%) | 3 (2,2%) | >0,05 |

One-way ANOVA, Levene's test for homogeneity of variances and multiple comparisons with Bonferroni and Tukey´s corrections. The p-values <0.05 indicate SSD. Own elaboration.

**Table 9. Average weekly frequency of dietary intake by food groups and sex**

| **Food groups** | **Total** | **Female** | **Male** | **p-values** |
| --- | --- | --- | --- | --- |
| G1 | 8,54 | 8,51 | 8,56 | >0,05 |
| G2 | 3,13 | 3,36 | 2,86 | <0,05 |
| G3 | 6,87 | 6,47 | 7,31 | <0,05 |
| G4 | 3,80 | 3,79 | 3,80 | >0,05 |
| G5 | 7,21 | 7,28 | 7,13 | >0,05 |
| G6 | 11,27 | 10,43 | 12,22 | <0,05 |
| G7 | 1,73 | 1,39 | 2,11 | <0,05 |

The average weekly frequency is reported as the average number of times per week. G1: fruits, vegetables and greens; G2: whole grains and legumes; G3: beef, chicken, eggs, fish, and seafood; G4: dairy and dairy products; G5: oils, butter and margarine; G6: refined sugars and sweets; G7: processed meats. One-way ANOVA, Levene's test for homogeneity of variances and multiple comparisons with Bonferroni and Tukey´s corrections. The p-values <0.05 indicate SSD. SSD was found between food groups G1, G3, G5, and G6 compared to other food groups by sex and in overall totals per group. Own elaboration.

**Table 10. Average weekly frequency of dietary intake of food groups by BMI**

| **Food groups** | **Normal-weight 1** | **Overweight 2** | **Obesity 3** | **p-values** |
| --- | --- | --- | --- | --- |
| G1 | 9,64 | 8,60 | 7,47 | <0,05 1,2,3 |
| G2 | 3,22 | 3,36 | 2,84 | <0,05 2,3 |
| G3 | 6,83 | 7,43 | 6,41 | <0,05 1,2  <0,05 2,3 |
| G4 | 3,69 | 4,36 | 3,42 | <0,05 1,2  <0,05 2,3 |
| G5 | 7,09 | 7,52 | 7,04 | >0,05 1,2,3 |
| G6 | 9,03 | 12,29 | 12,46 | <0,05 1,3  <0,05 1,2 |
| G7 | 1,49 | 2,05 | 1,67 | <0,05 1,2  <0,05 2,3 |

Own elaboration.

**Table 11. Average weekly frequency of dietary intake of food groups by obesity type**

| **Food groups** | **Type I Obesity a** | **Type II Obesity b** | **Type III Obesity c** | **p-values** |
| --- | --- | --- | --- | --- |
| G1 | 7,61 | 6,93 | 8,17 | <0,05 1,2,3 |
| G2 | 2,96 | 2,73 | 2,50 | >0,05 1,2,3 |
| G3 | 6,54 | 5,53 | 8,00 | <0,05 1,2,3 |
| G4 | 3,21 | 3,63 | 3,83 | >0,05 1,2,3 |
| G5 | 6,89 | 7,47 | 6,67 | <0,05 1,2  <0,05 2,3 |
| G6 | 13,21 | 12,98 | 7,67 | <0,05 1,3  <0,05 2,3 |
| G7 | 1,46 | 2,20 | 1,33 | <0,05 1,2  <0,05 2,3 |

Tables 11 and 12. The average weekly frequency is reported as the average number of times per week. G1: fruits, vegetables and greens; G2: whole grains and legumes; G3: beef, chicken, eggs, fish, and seafood; G4: dairy and dairy products; G5: oils, butter and margarine; G6: refined sugars and sweets; G7: processed meats. One-way ANOVA, Levene's test for homogeneity of variances and multiple comparisons with Bonferroni and Tukey´s corrections. The p-values <0.05 indicate SSD. SSD was found between food groups G1, G3, G5, and G6 compared to the rest of the food groups by obesity type. Own elaboration.

**Table 12. CVR classified by WHtR, WHR, and WC, 5-years forecasted**

| **CVR Classification** | **n (%)** | ***X2*** | **Female** | **Male** | **p-values** |
| --- | --- | --- | --- | --- | --- |
| **WHtR** | | | | | |
| Very high risk | 45 (33%) | p<0,01 | 24 (17,6%) | 21 (15,4%) | >0,05 |
| High risk | 68 (50%) | 34 (25%) | 34 (25%) | >0,05 |
| No risk | 23 (17%) | 14 (10,4%) | 9 (6,6%) | >0,05 |
| **WHR** | | | | | |
| High risk | 62 (45,6%) | p<0,01 | 42 (31%) | 20 (14,6%) | <0,05 |
| Low risk | 36 (26,5%) | 19 (14%) | 17 (12,5%) | >0,05 |
| Very low risk | 38 (28%) | 11 (8,1%) | 27 (19,9%) | <0,05 |
| **WC** | | | | | |
| High risk | 61 (44,9%) | p<0,01 | 37 (27,2%) | 24 (17,7%) | <0,05 |
| Intermediate risk | 29 (21,3%) | 14 (10,3%) | 15 (11%) | >0,05 |
| Low risk | 46 (33,8%) | 21 (15,4%) | 25 (18,4%) | >0,05 |

WHtR: Waist-to-Height Ratio, WHR: Waist-to-Hip Ratio, WC: Waist Circumference. n: Sample size of each group classified by anthropometry. In rows, grouped p-values of p<0.05 indicate SSD in the Chi-square test between CVR classifications for each anthropometric index. In the last column, p-values <0.05 indicate SSD in the MWU test. Own elaboration.

**Table 13. Differences between CVR by Framingham (10-years forecasted) by sex**

|  | **GSU (n=136)** | **Female (n=72)1** | **Male (n=64)2** | **p-values** |
| --- | --- | --- | --- | --- |
| **FRS-I**  **Median**  **(95% CI)** | 5,98  (7,24-10,82) | 6,13  (6,41-10.48) | 5,72  (6,58-12,79) | 0,5471,2 |
| **FRS-C**  **Median**  **(95% CI)** | 4,48  (5,43-8,12) | 4,73  (4,60-4,86) | 4,29  (4,94-9,59) | 0,4181,2 |

Percentage medians and 95% confidence intervals (CI) were reported for the FRS-I/FRS-C scores. The KWH test for K-independent samples with Bonferroni correction was applied. The p-values <0.05 indicates SSD. Own elaboration.

**Table 14. Differences between CVR by Framingham (10-years forecasted) by BMI**

|  | **Normal-weight (n=45)1** | **Overweight (n=42)2** | **Obesity (n=49)3** | **p-value** |
| --- | --- | --- | --- | --- |
| **FRS-I**  **Median**  **(95% CI)** | 5,98  (5,22-13,17) | 6,26  (6,46-12,68) | 6,68  (6,00-11,93) | 0,9221,2,3 |
| **FRS-C**  **Median**  **(95% CI)** | 4,48  (3,91-9,88) | 4,69  (4,85-9,51) | 5,01  (4,50-8,95) | 0,9251,2,3 |

Percentage medians and 95% confidence intervals (CI) were reported for the FRS-I/FRS-C scores. The KWH test for K-independent samples with Bonferroni correction was applied. The p-values <0.05 indicates SSD. Own elaboration.

**Table 15. Differences between CVR by Framingham by obesity type**

|  | **Type I Obesity (n=28)1** | **Type II Obesity (n=15)2** | **Type III Obesity (n=6)3** | **p-value** |
| --- | --- | --- | --- | --- |
| **FRS-I**  **Median**  **(95% CI)** | 4,92  (4,66-11,76) | 6,85  (3,67-15,54) | 7,88  (0,87-17,93) | 0,0371,2,3 |
| **FRS-C**  **Median**  **(95% CI)** | 3,70  (3,49-8,82) | 5,14  (2,75-11,75) | 5,91  (0,65-13,45) | 0,0371,2  0,0151,3 |

Percentage medians and 95% confidence intervals (CI) were reported for the FRS-I/FRS-C scores. The KWH test for K-independent samples with Bonferroni correction was applied. The p-values <0.05 indicates SSD. Own elaboration.

**
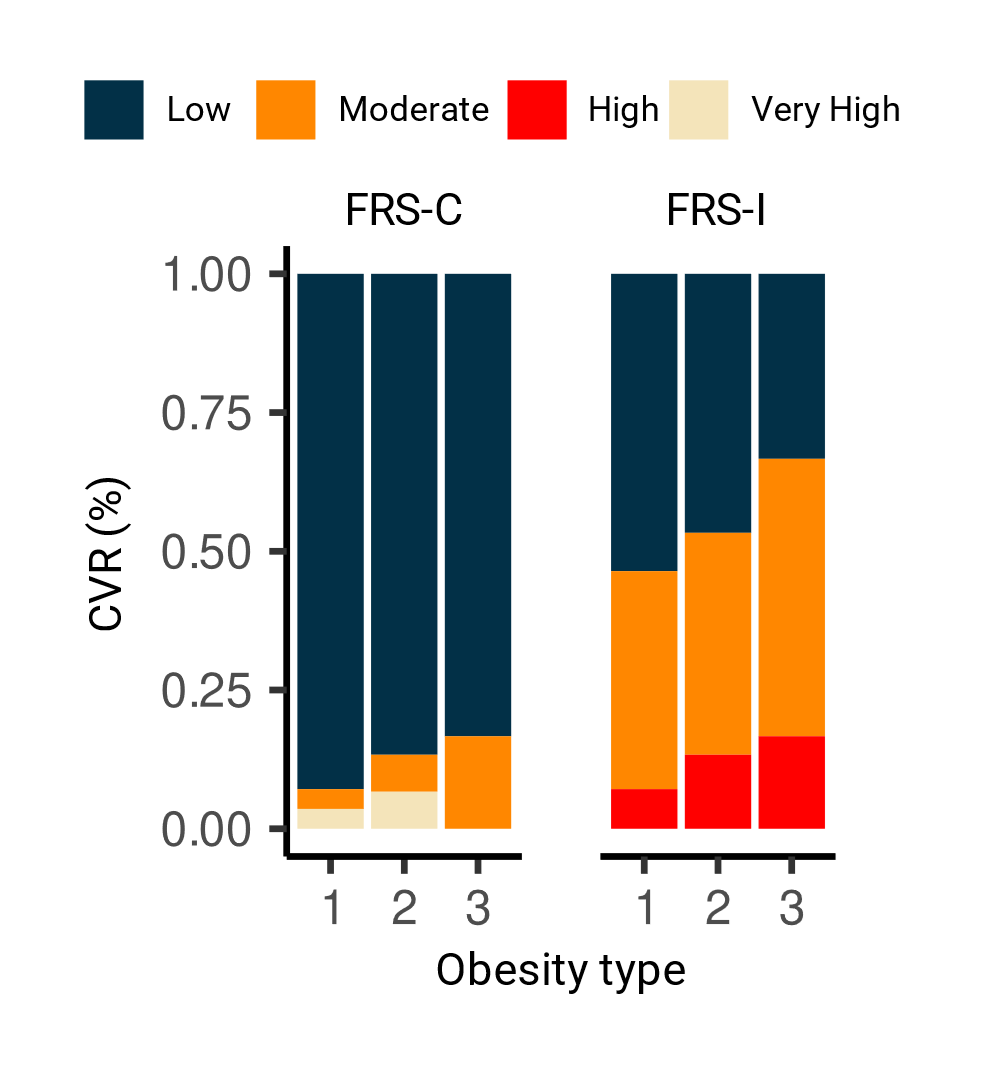
**

**Figure 1. Percentage of CVR by Framingham scores illustrated by obesity type.** Own elaboration.

Complementarily, using the KWH test, the percentage medians of CVR by FRS-I/FRS-C were compared across six (6) subgroups: type 2 diabetics (DT2), non-diabetics (ND), type 2 diabetic-Hypertensives (HDT2), uncontrolled-hypertensives (UH), non-diabetic hypertensives (HND), and insulin-resistants (IR). SSD were detected in medians of FRS-I and FRS-C (Figure 2, χ²=54.07, df=5, p-value=2.029e-10, both without Bonferroni correction). After Bonferroni adjustment using Dunn’s test, both scores remained significant. However, the CVR percentages for both scores did not show SSD between DT2 and HDT2. Table 24 presents the subgroups with SSD for FRS-I/FRS-C in Dunn’s test after Bonferroni adjustment.

#
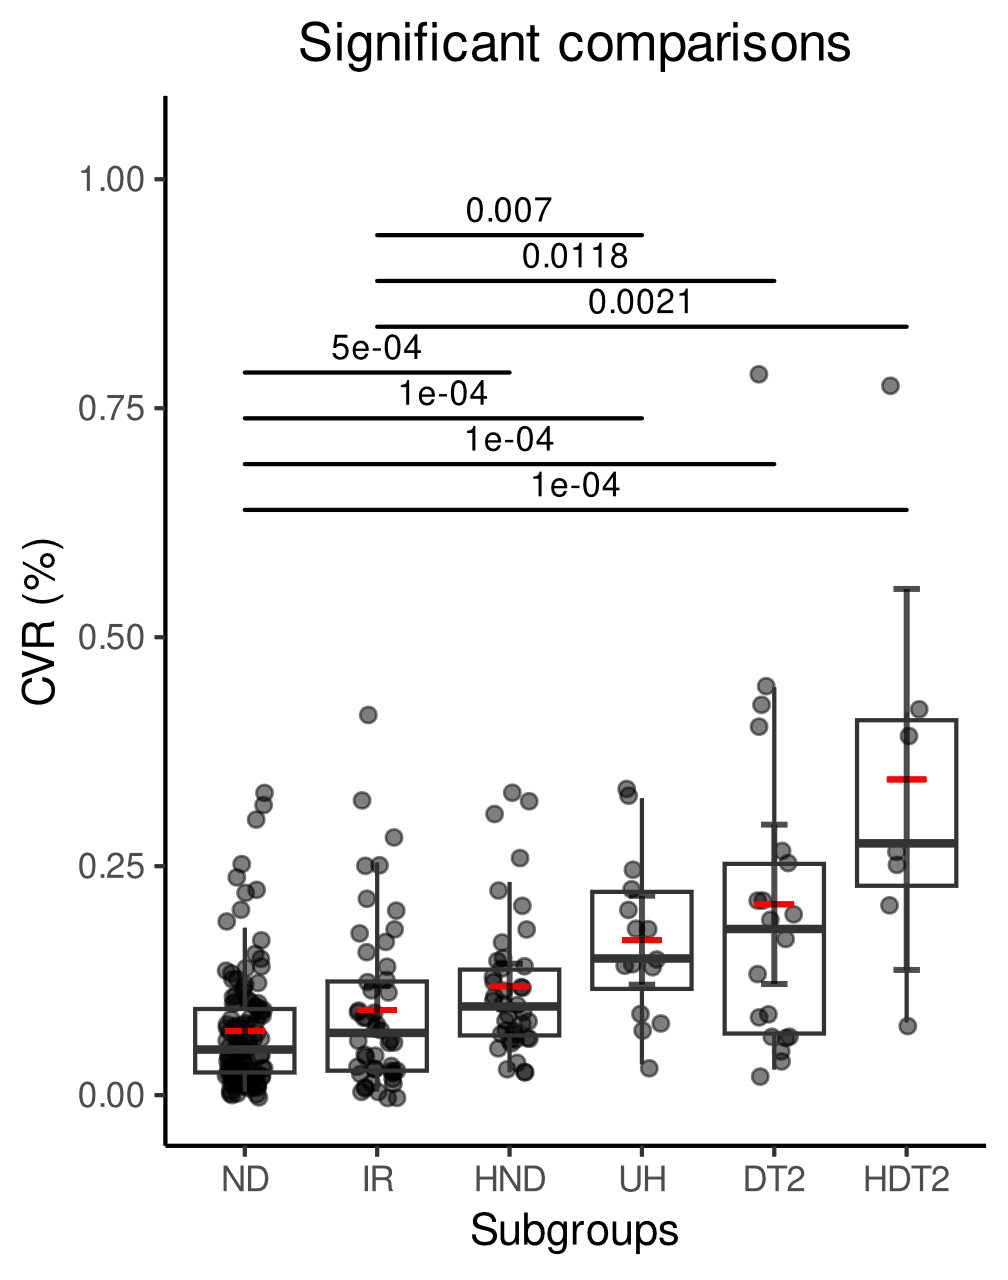


**Figure 2. CVR defined by FRS-I and FRS-C in KWH test without Bonferroni corrections.** Own elaboration.

**Table 16. CVR defined by FRS-I/FRS-C adjusted for Bonferroni in Dunn’s *post-hoc* test.**

| χ² | Z | p-values | p-adjusted | Group pairs |
| --- | --- | --- | --- | --- |
| 54.07 | 3.16 | <0.001 | 0.012 | DT2 - IR |
| 54.07 | 3.64 | <0.001 | 0.002 | HDT2 - IR |
| 54.07 | 3.31 | <0.001 | 0.007 | UH - IR |
| 54.07 | 4.36 | <0.001 | <0.001 | DT2 - ND |
| 54.07 | 4.34 | <0.001 | <0.001 | HDT2 - ND |
| 54.07 | 4.35 | <0.001 | <0.001 | UH - ND |
| 54.07 | 4.00 | <0.001 | <0.001 | HND - ND |

Type 2 diabetics (DT2), non-diabetics (ND), type 2 diabetic-Hypertensives (HDT2), Uncontrolled-hypertensives (UH), non-diabetic hypertensives (HND), Insulin-resistants (IR). Own elaboration.

**Table 17. Associations between anthropometry with sociodemographic information, physical activity, diet quality, and dietary patterns.**

| Independent variable | Estimator | Age | Weight | Height | BMI | WC | HC | WHR | WHtR |
| --- | --- | --- | --- | --- | --- | --- | --- | --- | --- |
| † Age (years), N=136 | r | 1 | -0,379** | -0,469* | -0,309* | -0,360* | -0,200** | -0,355* | -0,402* |
| A1 (18-29), N=20 | R2  SβC | 0,952  0,976* | 0,896  0,901* | 0,931  0,940* | 0,899  0,901* | 0,933  0,960* | 0,960  0,963* | 0,898  0,905* | 0,968  0,973* |
| A2 (30-39), N=30 | R2  SβC | 0,952  0,976* | 0,912  0,901* | 0,915  0,940* | 0,907  0,901* | 0,925  0,960* | 0,960  0,963* | 0,898  0,905* | 0,968  0,973* |
| A3 (40-49), N=27 | R2  SβC | 0,952  0,976* | 0,933  0,901* | 0,863  0,890* | 0,910  0,901* | 0,917  0,842* | 0,938  0,949* | 0,898  0,905* | 0,959  0,973* |
| A4 (50-59), N=28 | R2  SβC | 0,952  0,976* | 0,820  -0,379** | 0,835  -0,469* | 0,813  -0,309** | 0,895  -0,360** | 0,890  -0,200** | 0,876  -0,355** | 0,871  -0,402* |
| A5 (60), N=31 | R2  SβC | 0,952  0,976* | 0,814  -0,379** | 0,687  -0,469* | 0,805  -0,309** | 0,827  -0,360** | 0,875  -0,200** | 0,855  -0,355** | 0,850  -0,402* |
| SES, N=136 | R2  SβC | -0,064  -0,060 | 0,360  -0,251** | 0,897  -0,212** | 0,575  -0,251** | 0,815  -0,115** | 0,876  -0,127** | 0,855  -0,156** | 0,874  -0,214** |
| SES 1 Low-low, N=40 | R2  SβC | -0,064  -0,060 | 0,298  0,251** | 0,867  -0,212** | 0,516  0,420* | 0,899  0,210** | 0,835  0,267** | 0,835  0,267** | 0,860  -0,214** |
| SES 2 Low, N=38 | R2  SβC | -0,064  -0,060 | 0,280  0,251** | 0,867  -0,212** | 0,516  0,420* | 0,890  0,210** | 0,827  0,267** | 0,821  0,267** | 0,860  -0,214** |
| SES 3 Lower-middle, N=28 | R2  SβC | -0,064  -0,060 | 0,275  -0,251** | 0,919  0,670* | 0,502  0,251** | 0,886  0,210** | 0,810  0,267** | 0,810  0,267** | 0,899  0,906* |
| SES 4 Middle, N=15 | R2  SβC | -0,064  -0,060 | 0,275  -0,251** | 0,919  0,670* | 0,478  -0,251** | 0,723  -0,115** | 0,789  -0,127** | 0,764  -0,156** | 0,930  0,906* |
| SES 5 Upper-middle, N=15 | R2  SβC | -0,064  -0,060 | 0,275  -0,251** | 0,919  0,670* | 0,460  -0,251** | 0,714  -0,115** | 0,761  -0,127** | 0,752  -0,156** | 0,933  0,906* |

† Pearson correlation (r). A1-A5: Age groups (years). SES: Socioeconomic status. In Multiple Linear Regression (MLR), the upper figure corresponds to adjusted R² values, followed by the standardized β coefficients (SβC). Asterisks indicate statistical significance for SβC: * p<0.05, ** p<0.01, no asterisks p>0.05. Own elaboration.

**Table 17. Continuation.**

| Independent variable | Estimator | Age | Weight | Height | BMI | WC | HC | WHR | WHtR |
| --- | --- | --- | --- | --- | --- | --- | --- | --- | --- |
| Sex, N=136 | R2  SβC | 1,00  0,001 | 0,965  0,469* | 0,966  0,673* | 0,963  0,510* | 0,765  0,590* | 0,839  0,533* | 0,814  0,589* | 0,991  0,522* |
| Female, N=72 | R2  SβC | 1,00  0,001 | 0,965  0,469* | 0,847  0,567* | 0,962  0,515* | 0,765  0,590* | 0,839  0,717* | 0,814  0,589* | 0,991  0,578* |
| Male, N=64 | R2  SβC | 1,00  0,001 | 0,965  0,469* | 0,966  0,767* | 0,963  0,627* | 0,765  0,680* | 0,819  0,499* | 0,814  0,571* | 0,876  0,522* |
| Education level, N=136 | R2  SβC | 1,00  -0,615* | 0,879  0,439* | 0,537  0,218** | 0,544  0,299** | 0,855  0,287** | 0,514  0,328** | 0,517  0,311** | 0,781  0,522* |
| PEI, N=25 | R2  SβC | 1,00  -0,615* | 0,895  0,523* | 0,560  -0,446* | 0,718  -0,434* | 0,913  -0,391** | 0,514  -0,466* | 0,517  -0,327** | 0,890  -0,420* |
| SEC, N=41 | R2  SβC | 1,00  -0,615* | 0,716  0,560* | 0,617  -0,324** | 0,718  -0,321** | 0,878  -0,337** | 0,514  -0,228** | 0,514  -0,271** | 0,890  -0,435* |
| TUE, N=57 | R2  SβC | 1,00  0,538* | 0,701  0,560* | 0,617  0,445* | 0,623  0,344** | 0,764  0,418* | 0,520  0,440* | 0,517  0,332** | 0,789  0,378** |
| PGE, N=13 | R2  SβC | 1,00  -0,615* | 0,658  0,439* | 0,670  0,445* | 0,655  0,442* | 0,764  0,515* | 0,520  0,440* | 0,517  0,356** | 0,781  0,514* |
| Smoking, N=10 | R2  SβC | 0,978  -0,474* | 0,987  0,288** | 0,677  0,410* | 0,722  0,433* | 0,866  0,418* | 0,567  0,170** | 0,621  0,322** | 0,823  0,421* |
| Alcohol consumption, N=63 | R2  SβC | 0,978  -0,454* | 0,991  0,530* | 0,721  0,388** | 0,813  0,478* | 0,916  0,820* | 0,713  0,270** | 0,788  0,632* | 0,819  0,511* |

PEI: Primary education complete or incomplete, SEC: Secondary education complete or incomplete, TUE: Technical, technological, or university education complete. PGE: Postgraduate education (specialization, master or Doctorate degree completes). The table presents the adjusted R² values from MLR, standardized β coefficients (SβC), and p-values for SβC. *p <0.05, **p <0.01, no asterisks p>0.05. Own elaboration.

**Table 17. Continuation.**

| Independent variable | Estimator | Age | Weight | Height | BMI | WC | HC | WHR | WHtR |
| --- | --- | --- | --- | --- | --- | --- | --- | --- | --- |
| Normal weight, N=45 | R2  SβC | 0,968  -0,560* | 0,998  -0,617* | 0,988  -0,298** | 0,988  -0,548* | 0,991  -0,724* | 0,890  -0,724* | 0,945  -0,677* | 0,999  -0,683* |
| Overweight, N=42 | R2  SβC | 0,965  0,622* | 0,999  0,623* | 0,967  0,520* | 0,999  0,645* | 0,991  0,790* | 0,901  0,797* | 0,945  0,670* | 0,999  0,705* |
| Obesity, N=49 | R2  SβC | 0,948  0,637* | 0,999  0,712* | 0,978  0,523* | 0,990  0,786* | 0,991  0,797* | 0,901  0,798* | 0,945  0,670* | 0,999  0,705* |
| Physical activity, N=136 | R2  SβC | 0,998  -0.897* | 0,918  -0,599* | 0,899  0,416* | 0,974  -0,792* | 0,999  -0,702* | 0,922  -0,487* | 0,960  -0,497* | 0,970  -0,796* |
| PA. Yes, N=54 | R2  SβC | 0,917  -0,897* | 0,916  -0,599* | 0,717  0,329** | 0,974  -0,792* | 0,999  -0,602* | 0,922  -0,487* | 0,966  -0,500* | 0,970  -0,796* |
| PA. No, N=82 | R2  SβC | 0,945  0,897* | 0,917  0,891* | 0,717  0,329** | 0,974  0,792* | 0,999  0,830* | 0,922  0,717* | 0,966  0,786* | 0,970  0,896* |
| Diet quality, N=136 | R2  SβC | 0,950  -0,660* | 0,928  -0,478* | 0,648  -0,417* | 0,892  0,920* | 0,900  0,780* | 0,924  0,596* | 0,914  0,217** | 0,933  0,722* |
| DQ. Good, N=10 | R2  SβC | 0,966  0,590* | 0,970  -0,478* | 0,648  -0,417* | 0,893  -0,497* | 0,900  -0,568* | 0,917  -0,522* | 0,914  -0,316** | 0,933  -0,794* |
| DQ. Regular, N=48 | R2  SβC | 0,959  -0,572* | 0,970  0,826* | 0,648  0,523* | 0,899  0,821* | 0,923  0,718* | 0,924  0,596* | 0,914  0,419* | 0,933  0,740* |
| DQ. Poor, N=78 | R2  SβC | 0,943  -0,660* | 0,970  0,901* | 0,648  0,523* | 0,901  0,920* | 0,925  0,915* | 0,924  0,596* | 0,914  0,490* | 0,933  0,821* |
| Atherogenic diet, N=68 | R2  SβC | 0,984  0,622* | 0,960  0,572* | 0,721  0,523* | 0,955  0,714* | 0,915  0,763* | 0,919  0,525* | 0,874  0,303** | 0,933  0,675* |
| Mediterranean diet, N=35 | R2  SβC | 0,965  0,381** | 0,968  -0,460* | 0,721  -0,390** | 0,940  -0,565* | 0,915  -0,627* | 0,930  -0,563* | 0,874  -0,319** | 0,933  -0,638* |
| Western diet, N=33 | R2  SβC | 0,977  0,618* | 0,970  0,563* | 0,721  0,527* | 0,963  0,550* | 0,915  0,702* | 0,930  0,613* | 0,874  0,407* | 0,933  0,732* |

PA: Physical activity. DQ: Diet quality. The table presents the adjusted R² values from MLR, standardized β coefficients (SβC), and p-values for SβC. *p <0.05, **p <0.01, no asterisks p>0.05. Own elaboration.

**Table 18. Associations between blood biochemistry variables.**

|  | Insulin | HOMA-IR | Adiponectin | TC | TG | HDL | LDL | VLDL | TC/HDL | TG/HDL | LDL/HDL | TC-HDL | (TC-HDL)/HDL | TG/HC | HC/TG |
| --- | --- | --- | --- | --- | --- | --- | --- | --- | --- | --- | --- | --- | --- | --- | --- |
| Glycaemia | -0,861* | 0,731* | -0,588* | 0,843* | 0,561** | ND | ND | ND | ND | ND | ND | ND | ND | ND | ND |
| Insulin | 1 | 0,958* | -0,899* | 0,544** | 0,659* | ND | ND | 0,655* | ND | 0,676* | ND | ND | ND | 0,674* | ND |
| HOMA-IR | 0,958* | 1 | -0,901* | 0,570** | 0,654* | ND | ND | 0,642* | ND | 0,657* | ND | ND | ND | 0,625* | ND |
| TC | 0,544** | 0,570** | 0,518* | 1 | 0,280** | ND | 0,686* | 0,279** | 0,585* | 0,198** | 0,498* | 0,842* | 0,585* | ND | ND |
| TG | 0,659* | 0,654* | 0,617* | 0,280** | 1 | ND | 0,173** | 1,00* | 0,186** | 0,656* |  | 0,211** | 0,186** | 0,911* | -0,871* |
| HDL | ND | ND | ND | ND | ND | 1 | 0,200** | 0,170** | -0,680* | -0,703* | -0,525* | -0,505* | -0,680* | ND | ND |
| LDL | ND | ND | ND | 0,686* | 0,173** | 0,200** | 1 | 0,170** | 0,292** | ND | 0,659* | 0,478* | 0,292** | ND | ND |
| VLDL | 0,355** | 0,342** | ND | 0,279** | 1,00* | 0,170** | 0,170** | 1 | 0,188** | 0,658* | ND | 0,211** | 0,188** | 0,912* | -0,871* |
| TC/HDL | ND | ND | ND | 0,585* | 0,186** | -0,680* | 0,292** | 0,188** | 1 | 0,713* | 0,743* | 0,838* | 1,00* | ND | ND |
| TG/HDL | 0,276** | 0,257** | ND | 0,198** | 0,656* | -0,703* | ND | 0,658* | 0,713* | 1 | 0,532* | 0,526* | 0,713* | ND | -0,528* |
| LDL/HDL | ND | ND | ND | 0,498* | ND | -0,525* | 0,659* | ND | 0,743* | 0,532* | 1 | 0,698* | 0,743* | ND | ND |
| TC-HDL | ND | ND | ND | 0,842* | 0,211** | -0,505* | 0,478* | 0,211** | 0,838* | 0,526* | 0,698* | 1 | 0,838* | ND | ND |
| (CT-HDL)/HDL | ND | ND | ND | 0,585* | 0,186** | -0,680* | 0,292** | 0,188** | 1,00* | 0,713* | 0,698* | 0,838* | 1 | ND | ND |
| TG/HC | 0,674* | 0,625* | -0,459* | ND | 0,911* | ND | ND | 0,912* | ND | 0,553* | ND | ND | ND | 1 | -0,979* |
| HC/TG | ND | ND | ND | ND | -0,871* | ND | ND | -0,871* | ND | -0,528* | ND | ND | ND | -0,979* | 1 |

TC: Total cholesterol, TG: Triglycerides, HC: Hip circumference. *p-value <0.01, **p-value < 0.05 in Pearson's correlation test. ND: Not detected. Own elaboration.

**Table 19. Associations between anthropometry with sociodemographic variables and blood biochemistry.**

| Independent variable | Age | Weight | Height | BMI | WC | HC | WHR | WHtR |
| --- | --- | --- | --- | --- | --- | --- | --- | --- |
| Number of children | 0,506* | -0,319** | 0,400* | 0,400* | 0,785* | 0,816* | 0,713* | 0,718* |
| SBP (mm Hg) | 0,500* | 0,814* | -0,223** | 0,560* | 0,640* | 0,705* | 0,717* | 0,715** |
| DBP (mm Hg) | 0,416* | 0,636* | -0,214** | 0,197** | 0,443* | 0,327** | 0,281** | 0,224** |
| BC by BMI | -0,309** | 0,879* | 0,820* | 1,00* | 0,813* | 0,831* | 0,623* | 0,794* |
| Glycaemia (mg/dL) | ND | 0,728* | ND | 0,406* | 0,930* | 0,619* | ND | 0,950* |
| Insulin (μUI/mL) | ND | 0,817* | ND | 0,448* | 0,946* | 0,619* | 0,628* | 0,832* |
| HOMA-IR | ND | 0,905* | ND | 0,457* | 0,963* | 0,634* | 0,730* | 0,946* |
| Insulin-resistance ¥ | ND | 0,820* | ND | 0,496* | 0,949* | 0,615* | 0,829* | 0,831* |
| Adiponectin (μg/mL) | ND | -0,484* | ND | -0,498* | -0,535* | -0,575* | -0,600* | -0,351** |
| C-reactive protein (mg/dL) | ND | 0,300** | ND | 0,240** | 0,245** | 0,206** | 0,273** | 0,150** |
| Total Cholesterol, TC (mg/dL) | 0,420* | 0,337** | 0,181** | 0,310** | 0,344** | 0,311** | 0,296** | 0,364** |
| Triglycerides, TG (mg/dL) | 0,530* | 0,273** | 0,181** | 0,241** | 0,315** | 0,614* | 0,566* | 0,263** |
| HDL Cholesterol (mg/dL) | -0,622* | -0,729* | ND | -0,477* | -0,874* | -0,450* | -0,621* | -0,502* |
| LDL Cholesterol (mg/dL) | 0,667* | 0,727* | ND | 0,623* | 0,660* | 0,544* | 0,297** | 0,458* |
| VLDL Cholesterol (mg/dL) | 0,566* | 0,279** | 0,194** | 0,259** | 0,335** | 0,314** | 0,265** | 0,360** |
| TC/HDL | 0,567* | 0,440* | 0,111** | 0,456* | 0,573* | 0,406* | 0,503* | 0,774* |
| TG/HDL | 0,628* | 0,478* | 0,110** | 0,410* | 0,644* | 0,498* | 0,407* | 0,529* |
| LDL/HDL | 0,723* | 0,788* | ND | 0,784* | 0,733* | 0,625* | 0,570* | 0,828* |
| TC-HDL | 0,726* | 0,726* | 0,187** | 0,816* | 0,752* | 0,798* | 0,553* | 0,827* |
| (TC-HDL)/HDL | 0,823* | 0,500* | 0,160** | 0,816* | 0,773* | 0,506* | 0,453* | 0,774* |
| Weight | -0,479* | 1 | 0,623* | 0,879* | 0,908* | 0,831* | 0,491* | 0,708* |
| Height | -0,339** | 0,623* | 1 | 0,592* | 0,407* | 0,211** | 0,460* | -0,680* |
| BMI | -0,309** | 0,879* | 0,592* | 1 | 0,893* | 0,831* | 0,423* | 0,889* |
| WC | -0,360** | 0,908* | 0,407* | 0,893* | 1 | 0,845* | 0,635* | 0,907* |
| HP | -0,200** | 0,531* | 0,211** | 0,926* | 0,845* | 1 | 0,532* | 0,828* |
| WHR | -0,355** | 0,691* | 0,460* | 0,423* | 0,635* | 0,532* | 1 | 0,686* |
| WHtR | -0,402* | 0,708* | -0,680* | 0,889* | 0,907* | 0,828* | 0,686* | 1 |

BC: Body composition (BMI assumed as a continuous variable). SBP: Systolic blood pressure. DBP: Diastolic blood pressure. BMI: Body mass index. WC: Waist circumference. HC: Hip circumference. WHR: Waist-to-hip ratio. WHtR: Waist-to-height ratio. ¥ Insulin resistance: Defined as hyperinsulinemia ≥12 μU/mL and HOMA-IR ≥2.5. Pearson’s correlation test was used to report the r value. *p-value <0.01, **p-value <0.05. ND: Not detected. Own elaboration.

**Table 20. Associations between blood biochemistry with abdominal obesity (AO) and cardiovascular risk (CVR).**

| Independent Variable | Estimator | AO-WC | CVR-WC | AO-WHtR | CVR-WHtR | AO-WHR | CVR-WHR | FRS-I | FRS-C |
| --- | --- | --- | --- | --- | --- | --- | --- | --- | --- |
| Glycaemia | R2  SβC | 0,867  0,386** | 0,998  0,919* | 0,761  0,382** | 0,927  0,950* | ND | ND | 0,987  0,968* | 0,987  0,968* |
| Insulin | R2  SβC | 0,899  0,425* | 0,997  0,931* | 0,890  0,477* | 0,890  0,954* | 0,890  0,586* | 0,890  0,591* | 0,907  0,877* | 0,907  0,877* |
| HOMA-IR | R2  SβC | 0,899  0,442* | 0,999  0,958* | 0,890  0,470* | 0,897  0,960* | 0,899  0,383** | 0,901  0,991* | 0,963  0,970* | 0,963  0,970* |
| Adiponectin | R2  SβC | 0,867  -0,466* | 0,960  -0,482* | 0,946  -0,440* | 0,977  -0,496* | ND | ND | 0,963  -0,502* | 0,963  -0,502* |
| CRP | R2  SβC | 0,418  0,220** | 0,500  0,266** | 0,426  0,216** | 0,516  0,285** | ND | ND | ND | ND |
| TC | R2  SβC | 0,845  0,915* | 0,977  0,913* | 0,944  0,940* | 0,940  0,922* | 0,899  0,430* | 0,940  0,376** | 0,946  0,689* | 0,946  0,689* |
| TG | R2  SβC | 0,843  0,263** | 0,969  0,901* | 0,940  0,286** | 0,927  0,950* | 0,890  0,622* | 0,970  0,681* | 0,907  0,877* | 0,907  0,877* |
| HDL | R2  SβC | 0,912  0,215** | 0,990  -0,616* | 0,937  0,230** | 0,968  -0,638* | 0,950  -0,676* | 0,950  -0,676* | 0,989  -0,760* | 0,989  -0,760* |
| LDL | R2  SβC | 0,815  0,460* | 0,914  0,416* | 0,826  0,455* | 0,988  0,520* | 0,803  0,297** | 0,923  0,517* | 0,767  0,793* | 0,767  0,793* |
| VLDL | R2  SβC | 0,845  0,260** | 0,966  0,913* | 0,947  0,282** | 0,968  0,871* | 0,715  0,230** | 0,698  0,705* | 0,890  0,901* | 0,890  0,901* |
| TC/HDL | R2  SβC | 0,801  0,222** | 0,930  0,802* | 0,917  0,306* | 0,926  0,802* | 0,916  0,217** | 0,916  0,798* | 0,602  0,609* | 0,602  0,609* |
| TG/HDL | R2  SβC | 0,873  0,243** | 0,961  0,803* | 0,961  0,286** | 0,961  0,891* | 0,860  0,237** | 0,953  0,732* | 0,716  0,511* | 0,716  0,511* |
| LDL/HDL | R2  SβC | 0,801  0,324** | 0,955  0,816* | 0,926  0,416* | 0,940  0,922* | 0,766  0,420* | 0,780  0,820* | 0,716  0,581* | 0,716  0,581* |
| TC-HDL | R2  SβC | 0,895  0,190** | 0,918  0,733* | 0,968  0,290** | 0,972  0,961* | 0,923  0,340** | 0,826  0,940* | 0,890  0,638* | 0,890  0,638* |
| (TC-HDL)/HDL | R2  SβC | 0,907  0,222** | 0,907  0,860* | 0,907  0,214** | 0,928  0,902* | 0,916  0,170** | 0,916  0,908* | 0,890  0,909* | 0,890  0,909* |
| TG/HC | R2  SβC | 0,863  0,431* | 0,915  0,799* | 0,892  0,415* | 0,920  0,800* | 0,716  0,300** | 0,937  0,898* | 0,899  0,816* | 0,899  0,816* |
| HC/TG | R2  SβC | 0,716  -0,263** | 0,806  -0,205** | 0,729  -0,263** | 0,806  -0,336** | 0,563  -0,184** | 0,514  -0,286** | ND | ND |

CRP: C-reactive protein, TC: Total cholesterol, TG: Triglycerides, HC: Hip circumference, WC: Waist circumference, WHR: Waist-to-hip ratio, WHtR: Waist-to-height ratio, CVR: Anthropometric cardiovascular risk 5 years forecasted. FRS-I: Framingham Risk Score - International, 10 years forecasted. FRS-C: Framingham Risk Score - Colombia, 10 years forecasted. ND: Not detected. In MLR, the table reports the adjusted R² values, standardized β coefficients (SβC), and p-values for SβC. *p-value <0.01, **p-value <0.05. The tests between FRS-I and FRS-C scores with the rest of the variables were adjusted for sex, age, SBP, hypertension under treatment, smoking, alcohol consumption, and total cholesterol and HDL levels, as well as Type 2 Diabetes status. Own elaboration.

**Table 21. Associations between blood biochemistry with anthropometric cardiovascular risk categories.**

| Independent variable | Estimator | WC-LR | WC-MR | WC-HR | WHtR-NR | WHtR-NR | WHtR-VHR | WHR-VL | WHR-LR | WHR-HR |
| --- | --- | --- | --- | --- | --- | --- | --- | --- | --- | --- |
| Glycaemia | R2  SβC | 0,998  0,771* | 0,998  0,882* | 0,998  0,919* | 0,927  -0,560* | 0,927  0,926* | 0,927  0,950* | ND | ND | ND |
| Insulin | R2  SβC | 0,997  -0,642* | 0,997  0,915* | 0,997  0,931* | 0,890  -0,754* | 0,890  0,877* | 0,890  0,954* | 0,890  -0,791* | 0,890  -0,567* | 0,890  0,591* |
| HOMA-IR | R2  SβC | 0,999  -0,780* | 0,999  0,861* | 0,999  0,958* | 0,897  -0,677* | 0,897  0,801* | 0,897  0,960* | 0,901  -0,822* | 0,901  -0,903* | 0,901  0,991* |
| Adiponectin | R2  SβC | 0,960  -0,217** | 0,960  -0,390** | 0,960  -0,482* | 0,977  0,529* | 0,977  -0,399** | 0,977  -0,496* | ND | ND | ND |
| CRP | R2  SβC | 0,500  0,050** | 0,500  0,200** | 0,500  0,266** | 0,516  -0,100** | 0,516  0,250** | 0,516  0,285** | ND | ND | ND |
| TC | R2  SβC | 0,977  0,280** | 0,977  0,729* | 0,977  0,913* | 0,940  -0,763* | 0,940  0,572* | 0,940  0,922* | 0,940  -0,800* | 0,940  0,280** | 0,940  0,576* |
| TG | R2  SβC | 0,969  0,200** | 0,969  0,815* | 0,969  0,901* | 0,927  -0,844* | 0,927  0,801* | 0,927  0,950* | 0,970  -0,837* | 0,970  -0,400* | 0,970  0,781* |
| HDL | R2  SβC | 0,990  0,633* | 0,990  -0,690* | 0,990  -0,616* | 0,968  0,843* | 0,968  -0,638* | 0,968  -0,801* | 0,950  -0,876* | 0,950  -0,750* | 0,950  -0,676* |
| LDL | R2  SβC | 0,914  -0,672* | 0,914  0,375** | 0,914  0,416** | 0,988  -0,598* | 0,988  0,400** | 0,988  0,520* | 0,923  -0,860* | 0,923  0,147** | 0,923  0,517* |
| VLDL | R2  SβC | 0,966  0,244** | 0,966  0,569* | 0,966  0,913* | 0,968  -0,871* | 0,968  0,801* | 0,968  0,871* | 0,698  -0,705* | 0,698  -0,478* | 0,698  0,785* |
| TC/HDL | R2  SβC | 0,930  -0,802* | 0,930  0,469* | 0,930  0,802* | 0,926  -0,802* | 0,926  0,563* | 0,926  0,802* | 0,916  -0,798* | 0,916  0,463* | 0,916  0,798* |
| TG/HDL | R2  SβC | 0,961  -0,467* | 0,961  0,718* | 0,961  0,803* | 0,961  -0,591* | 0,961  0,578* | 0,961  0,891* | 0,953  -0,816* | 0,953  -0,400** | 0,953  0,732* |
| LDL/HDL | R2  SβC | 0,955  -0,816* | 0,955  0,520* | 0,955  0,816* | 0,940  -0,922* | 0,940  0,516* | 0,940  0,922* | 0,780  -0,501* | 0,780  0,200** | 0,780  0,820* |
| TC-HDL | R2  SβC | 0,918  -0,513* | 0,918  0,569* | 0,918  0,733* | 0,972  -0,566* | 0,972  0,327** | 0,972  0,961* | 0,826  -0,663* | 0,826  0,370** | 0,826  0,940* |
| (TC-HDL)/HDL | R2  SβC | 0,907  -0,544* | 0,907  0,617* | 0,907  0,860* | 0,928  -0,630* | 0,928  0,379** | 0,928  0,902* | 0,916  -0,547* | 0,916  0,280** | 0,916  0,908* |
| TG/HC | R2  SβC | 0,915  -0,617* | 0,915  0,650* | 0,915  0,799* | 0,920  -0,740* | 0,920  0,548* | 0,920  0,800* | 0,937  -0,501* | 0,937  0,544* | 0,937  0,898* |
| HC/TG | R2  SβC | 0,806  -0,205** | 0,806  0,893* | 0,806  0,926* | 0,806  -0,336** | 0,806  0,890* | 0,806  0,939* | 0,514  -0,286** | 0,514  0,432** | 0,514  0,968* |

CRP: C-reactive protein, TC: Total cholesterol, TG: Triglycerides, WC: Waist Circumference, HC: Hip Circumference, WHtR: Waist-to-Height Ratio, WHR: Waist-to-Hip Ratio, VL: Very Low Risk, LR: Low Risk, MR: Intermediate Risk. HR: High Risk. VHR: Very High Risk. NR: No Cardiovascular Risk. In MLR, the table reports the adjusted R² values, standardized β coefficients (SβC), and p-values for SβC. *p-value <0,01, **p-value <0,05. Own elaboration.

**Table 22. Associations between blood biochemistry with cardiovascular risk categories by FRS-I/FRS-C.**

| Independent variable | Estimator | FRS-I LR | FRS-I MR | FRS-I HR | FRS-I VHR | FRS-C LR | FRS-C MR | FRS-C HR | FRS-C VHR |
| --- | --- | --- | --- | --- | --- | --- | --- | --- | --- |
| Glycaemia | R2  SβC | 0,987  0,460* | 0,987  0,724* | 0,987  0,833* | 0,987  0,968* | 0,980  0,457* | 0,980  0,718* | 0,980  0,810* | 0,980  0,968* |
| Insulin | R2  SβC | 0,907  0,465* | 0,907  0,830* | 0,907  0,892* | 0,907  0,955* | 0,907  0,459* | 0,907  0,740* | 0,907  0,823* | 0,907  0,923* |
| HOMA-IR | R2  SβC | 0,963  0,450* | 0,963  0,810* | 0,963  0,906* | 0,963  0,920* | 0,963  0,449* | 0,963  0,809* | 0,963  0,905* | 0,963  0,923* |
| Adiponectin | R2  SβC | 0,963  -0,437** | 0,963  -0,680* | 0,963  -0,717* | 0,963  -0,825* | 0,963  -0,636* | 0,963  -0,679* | 0,963  -0,716* | 0,963  -0,824* |
| TC | R2  SβC | 0,946  0,560* | 0,946  0,605* | 0,946  0,667* | 0,946  0,689* | 0,946  0,560* | 0,946  0,604* | 0,946  0,665* | 0,946  0,689* |
| TG | R2  SβC | 0,907  0,479* | 0,907  0,716* | 0,907  0,820* | 0,907  0,877* | 0,907  0,678* | 0,907  0,715* | 0,907  0,819* | 0,907  0,877* |
| HDL | R2  SβC | 0,989  -0,578* | 0,989  -0,663* | 0,989  -0,742* | 0,989  -0,760* | 0,989  -0,576* | 0,989  -0,648* | 0,989  -0,753* | 0,989  -0,760* |
| LDL | R2  SβC | 0,767  -0,872* | 0,767  0,589* | 0,767  0,700* | 0,767  0,892* | 0,767  -0,872* | 0,767  0,589* | 0,767  0,700* | 0,767  0,892* |
| VLDL | R2  SβC | 0,890  0,420** | 0,890  0,699* | 0,890  0,801* | 0,890  0,923* | 0,890  0,420** | 0,890  0,699* | 0,890  0,801* | 0,890  0,923* |
| TC/HDL | R2  SβC | 0,602  0,498* | 0,602  0,526* | 0,602  0,587* | 0,602  0,609* | 0,602  0,496* | 0,602  0,525* | 0,602  0,586* | 0,602  0,609* |
| TG/HDL | R2  SβC | 0,716  0,423* | 0,716  0,452* | 0,716  0,496* | 0,716  0,511* | 0,716  0,423* | 0,716  0,452* | 0,716  0,495* | 0,716  0,511* |
| LDL/HDL | R2  SβC | 0,716  0,440* | 0,716  0,516* | 0,716  0,566* | 0,716  0,581* | 0,716  0,440* | 0,716  0,516* | 0,716  0,566* | 0,716  0,581* |
| TC-HDL | R2  SβC | 0,890  0,537* | 0,890  0,570* | 0,890  0,610* | 0,890  0,638* | 0,890  0,537* | 0,890  0,570* | 0,890  0,610* | 0,890  0,638* |
| (TC-HDL)/HDL | R2  SβC | 0,890  0,879* | 0,890  0,889* | 0,890  0,899* | 0,890  0,909* | 0,890  0,879* | 0,890  0,889* | 0,890  0,899 | 0,890  0,909* |
| TG/HC | R2  SβC | 0,899  0,650* | 0,899  0,702* | 0,899  0,783* | 0,899  0,816* | 0,899  0,650* | 0,899  0,702* | 0,899  0,783* | 0,899  0,816* |

TC: Total cholesterol. TG: Triglycerides. FRS-I: Framingham Risk Score - International, 10 years forecasted. FRS-C: Framingham Risk Score - Colombia, 10 years forecasted. LR: Low risk. MR: Moderate risk. HR: High risk. VHR: Very high risk. In MLR, the table reports the adjusted R² values, standardized β coefficients (SβC), and p-values for SβC. *p-value <0.01, **p-value <0.05. The tests between FRS-I and FRS-C scores with the rest of the variables were adjusted for sex, age, SBP, hypertension under treatment, smoking, alcohol consumption, and total cholesterol and HDL levels, as well as Type 2 Diabetes status. Own elaboration.

**Table 23. Associations between anthropometry and blood biochemistry with hypertension categories and cardiovascular risk.**

|  | **Estimator** | **Weight** | **Height** | **BMI** | **Glycaemia** | **Insulin** | **HOMA-IR** | **Adiponectin** | **TC** | **TG** | **HDL** | **LDL** | **VLDL** |
| --- | --- | --- | --- | --- | --- | --- | --- | --- | --- | --- | --- | --- | --- |
| **SBP †** | R2  SβC | 0,814* | -0,223** | 0,560* | 0,893* | 0,917* | 0,995* | -0,620* | 0,920* | 0,937* | -0,540* | 0,980* | 0,930* |
| **DBP †** | R2  SβC | 0,636* | -0,214** | 0,197** | 0,635* | 0,890* | 0,892* | -0,710* | 0,530* | 0,662* | -0,603* | 0,923* | 0,598* |
| **EH** | R2  SβC | 0,984  0,717* | ND | 0,977  0,710* | 0,524  0,423** | 0,943  0,892* | 0,961  0,918* | 0,914  -0,714* | 0,966  0,516* | 0,901  0,690* | 0,944  -0,679* | 0,998  0,636* | 0,899  0,690* |
| **ISH** | R2  SβC | 0,784  0,583* | ND | 0,765  0,523* | 0,628  0,695* | 0,923  0,928* | 0,928  0,948* | 0,923  -0,616* | 0,923  0,390** | 0,918  0,518* | 0,963  -0,718* | 0,916  0,536* | 0,917  0,510* |
| **IDH** | R2  SβC | 0,418  0,314** | ND | 0,638  0,217** | 0,517  0,487* | 0,910  0,915* | 0,923  0,934* | 0,920  -0,503* | 0,910  0,298** | 0,816  0,392* | 0,963  -0,660* | 0,907  0,675* | 0,798  0,392* |
| **HTC** | R2  SβC | 0,879  0,833* | ND | 0,860  0,799* | 0,560  0,630* | 0,879  0,899* | 0,903  0,936* | 0,928  -0,453* | 0,879  0,426* | 0,833  0,570* | 0,930  -0,945* | 0,968  0,988* | 0,832  0,561* |
| **HTC1** | R2  SβC | 0,879  0,454* | ND | 0,860  0,364** | 0,560  0,473* | 0,879  0,692* | 0,903  0,712* | 0,928  -0,369** | 0,879  0,426* | 0,833  0,570* | 0,930  -0,423* | 0,968  0,716* | 0,830  0,566* |
| **HTC2** | R2  SβC | 0,879  0,625* | ND | 0,860  0,580* | 0,560  0,522* | 0,879  0,773* | 0,903  0,834* | 0,928  -0,453** | 0,879  0,496* | 0,833  0,673* | 0,930  -0,520* | 0,968  0,832* | 0,830  0,647* |
| **HTC3** | R2  SβC | 0,879  0,833* | ND | 0,860  0,799* | 0,560  0,630* | 0,879  0,899* | 0,903  0,936* | 0,928  -0,563* | 0,879  0,580* | 0,833  0,897* | 0,930  -0,945* | 0,968  0,988* | 0,830  0,889* |
| **FRS-I** | R2  SβC | 0,965  0,815* | 0,450  0,410* | 0,890  0,836* | 0,987  0,968* | 0,907  0,877* | 0,963  0,970* | 0,963  -0,502* | 0,946  0,689* | 0,907  0,877* | 0,989  -0,760* | 0,767  0,793* | 0,890  0,901* |
| **FRS-C** | R2  SβC | 0,965  0,814* | 0,450  0,409* | 0,890  0,835* | 0,980  0,968* | 0,907  0,877* | 0,963  0,970* | 0,963  -0,502* | 0,946  0,689* | 0,907  0,877* | 0,989  -0,760* | 0,767  0,793* | 0,890  0,901* |

Adiponectin: Adiponectinemia. SBP: Systolic blood pressure, DBP: Diastolic blood pressure, EH: Essential hypertension, ISH: Isolated systolic hypertension, IDH: Isolated diastolic hypertension, HTC: Hypertension categories, HTC1: Hypertension Category 1, HTC2: Hypertension Category 2, HTC3: Hypertension Category 3, TC: Total cholesterol, TG: Triglycerides, FRS-I: Framingham Risk Score - International, 10 years forecasted, FRS-C: Framingham Risk Score - Colombia, 10 years forecasted. † Pearson’s correlation. In MLR, the table reports the adjusted R² values, standardized β coefficients (SβC), and p-values for SβC. *p-value <0.01, **p-value <0.05. The tests between FRS-I and FRS-C scores with the rest of the variables were adjusted for sex, age, SBP, hypertension under treatment, smoking, alcohol consumption, and total cholesterol and HDL levels, as well as Type 2 Diabetes status. Own elaboration.

**Table 24. Associations between atherogenic markers with categories of arterial hypertension.**

|  | **Estimator** | **TC/HDL** | **TG/HDL** | **LDL/HDL** | **TC-HDL** | **(TC-HDL)/HDL** | **TG/HC** | **HC/TG** |
| --- | --- | --- | --- | --- | --- | --- | --- | --- |
| **SBP †** | r | 0,944* | 0,963* | 0,981* | 0,952* | 0,972* | 0,945* | -0,262* |
| **DBP †** | r | 0,714* | 0,721* | 0,730* | 0,745* | 0,811* | 0,820* | -0,116* |
| **EH** | R2  SβC | 0,970  0,620* | 0,901  0,970* | 0,998  0,680* | 0,963  0,920* | 0,926  0,952* | 0,920  0,933* | 0,455  -0,318* |
| **ISH** | R2  SβC | 0,968  0,832* | 0,970  0,819* | 0,942  0,533* | 0,968  0,830* | 0,912  0,923* | 0,919  0,714* | ND |
| **IDH** | R2  SβC | 0,900  0,724* | 0,850  0,681* | 0,820  0,418* | 0,900  0,720* | 0,903  0,701* | 0,824  0,660* | ND |
| **HTC** | R2  SβC | 0,953  0,652* | 0,914  0,457* | 0,715  0,602* | 0,953  0,620* | 0,960  0,732* | 0,732  0,788* | ND |
| **HTC1** | R2  SβC | 0,953  0,417* | 0,914  0,323* | 0,715  0,400* | 0,953  0,425* | 0,960  0,413* | 0,732  0,566* | ND |
| **HTC2** | R2  SβC | 0,953  0,529* | 0,914  0,398* | 0,715  0,551* | 0,923  0,545* | 0,960  0,634* | 0,732  0,677* | ND |
| **HTC3** | R2  SβC | 0,953  0,652* | 0,914  0,457* | 0,715  0,602* | 0,923  0,620* | 0,960  0,732* | 0,732  0,788* | ND |

† Pearson’s correlation. SBP: Systolic blood pressure. DBP: Diastolic blood pressure. EH: Essential hypertension. ISH: Isolated systolic hypertension. IDH: Isolated diastolic hypertension. HTC: Hypertension categories. HTC1: Hypertension Category 1. HTC2: Hypertension Category 2. HTC3: Hypertension Category 3, TC: Total cholesterol, TG: Triglycerides. HC: Hip circumference. In MLR, the table reports the adjusted R² values, standardized β coefficients (SβC) and p-values for SβC. *p-value <0.01, **p-value <0.05. ND: Not detected. No test was corrected for HDL. Own elaboration.

**Table 25. Associations between physical activity, dietary patterns and quality, intake of fried foods/fruits with anthropometry, abdominal obesity (AO), and cardiovascular risk.**

|  | Est. | Weight | Height | BMI | WC | HC | WHR | WHtR | AO-WC | CVR-WC | AO-WHtR | CVR-WHtR | AO-WHR | CVR-WHR | FRS-I | FRS-C |
| --- | --- | --- | --- | --- | --- | --- | --- | --- | --- | --- | --- | --- | --- | --- | --- | --- |
| PA-Yes | R2  SβC | 0,890  -0,321** | ND | 0,867  -0,216** | 0,901  -0,602* | 0,514  -0,187** | 0,800  -0,416* | 0,716  -0,426* | 0,963  -0,618* | 0,717  -0,338** | 0,955  -0,423* | 0,698  -0,469* | 0,627  -0,403* | 0,658  -0,450* | 0,890  -0,435* | 0,890  -0,434* |
| PA-No | R2  SβC | 0,890  0,977* | ND | 0,867  0,890* | 0,901  0,990* | 0,514  0,623* | 0,800  0,430* | 0,716  0,833* | 0,963  0,920* | 0,717  0,760* | 0,955  0,988* | 0,698  0,817* | 0,627  0,682* | 0,658  0,670* | 0,890  0,900* | 0,890  0,900* |
| PA-3XW | R2  SβC | 0,890  -0,236** | ND | 0,867  -0,276** | 0,901  -0,612* | 0,514  -0,166** | 0,800  -0,430* | 0,716  -0,325** | 0,963  -0,652* | 0,717  -0,355** | 0,955  -0,432* | 0,698  -0,383** | 0,627  -0,440* | 0,658  -0,490* | 0,890  -0,408* | 0,890  -0,407* |
| MOD-PA | R2  SβC | 0,890  -0,170** | ND | 0,867  -0,249** | 0,901  -0,233** | 0,514  -0,198** | 0,800  -0,160** | 0,716  -0,304** | 0,963  -0,284** | 0,717  -0,302** | 0,955  -0,329** | 0,698  -0,264** | 0,627  -0,181** | 0,658  -0,351** | 0,890  -0,405* | 0,890  -0,404* |
| MIX-PA | R2  SβC | 0,890  -0,216** | ND | 0,867  -0,249** | 0,901  -0,616* | 0,514  -0,214** | 0,800  -0,214** | 0,716  -0,292** | 0,963  -0,660* | 0,717  -0,670* | 0,955  -0,400* | 0,698  -0,289** | 0,627  -0,198** | 0,658  -0,425* | 0,890  -0,370** | 0,890  -0,370** |
| EX-RO | R2  SβC | 0,890  -0,450* | ND | 0,867  -0,258** | 0,801  -0,512* | 0,514  -0,234** | 0,800  -0,217** | 0,716  -0,294** | 0,763  -0,595* | 0,722  -0,359** | 0,705  -0,218** | 0,716  -0,335** | 0,627  -0,261** | 0,658  -0,416* | 0,890  -0,550* | 0,890  -0,550* |
| SED-HO | R2  SβC | 0,673  0,232** | ND | 0,655  0,180** | 0,630  0,624* | 0,530  0,418* | 0,629  0,274** | 0,440  0,302** | 0,963  0,627* | 0,722  0,460* | 0,760  0,346** | 0,644  0,356** | 0,488  0,430* | 0,430  0,412* | 0,728  0,347** | 0,728  0,347** |
| DQ | R2  SβC | 0,866  0,478* | ND | 0,840  0,497* | 0,921  0,620* | 0,817  0,496* | 0,901  0,517* | 0,728  0,522* | 0,840  0,578* | 0,923  0,519* | 0,728  0,522** | 0,890  0,570* | 0,872  0,360** | 0,723  0,560* | 0,933  0,677* | 0,933  0,676* |
| ATH-DIET | R2  SβC | 0,866  0,572* | ND | 0,840  0,514* | 0,921  0,716* | 0,817  0,525* | 0,901  0,303** | 0,728  0,675* | 0,840  0,689* | 0,923  0,873* | 0,728  0,522* | 0,890  0,856* | 0,872  0,622* | 0,723  0,867* | 0,933  0,887* | 0,933  0,886* |
| MED-DIET | R2  SβC | 0,866  -0,460* | ND | 0,840  -0,565* | 0,921  -0,729* | 0,817  -0,563* | 0,901  -0,419* | 0,728  -0,638* | 0,840  -0,286** | 0,923  -0,717* | 0,728  -0,631* | 0,890  -0,802* | 0,872  -0,408* | 0,723  -0,700* | 0,933  -0,705* | 0,933  -0,705* |
| WES-DIET | R2  SβC | 0,866  0,823* | ND | 0,840  0,690* | 0,921  0,823* | 0,817  0,413* | 0,901  0,507* | 0,728  0,632* | 0,840  0,840* | 0,923  0,863* | 0,728  0,624* | 0,890  0,707* | 0,872  0,639* | 0,723  0,595* | 0,933  0,716* | 0,933  0,716* |
| FF | R2  SβC | 0,687  0,637* | ND | 0,695  0,680* | 0,921  0,234** | 0,817  0,418* | 0,901  0,443* | 0,728  0,516* | 0,726  0,315** | 0,923  0,795* | 0,616  0,520* | 0,716  0,493* | 0,872  0,521* | 0,723  0,468* | 0,820  0,501* | 0,820  0,501* |
| FRUITS | R2  SβC | 0,736  -0,200** | ND | 0,688  -0,207** | 0,921  -0,513* | 0,817  -0,298** | 0,901  -0,300** | 0,728  -0,565* | 0,726  -0,503* | 0,923  -0,500* | 0,616  -0,517* | 0,716  -0,601* | 0,872  -0,301** | 0,723  -0,372** | 0,820  -0,608* | 0,820  -0,608* |

Est.: Estimator. PA: Physical activity. PA-3XW: Performs physical activity at least 3 times per week. MOD-PA: Performs moderate aerobic physical activity. MIX-PA: Performs moderate or mixed aerobic physical activity. EX-RO: Has an exercise routine. SED-HO: Sedentary hours per day. DQ: Dietary quality. ATH-DIET: Atherogenic diet. MED-DIET: Mediterranean diet. WES-DIET: Western diet, FF: Fried foods, CVR: Anthropometric cardiovascular risk 5 years forecasted. FRS-I: Framingham Risk Score - International, 10-year forecasted. FRS-C: Framingham Risk Score - Colombia, 10-year forecasted. In MLR, the table reports the adjusted R² values, standardized β coefficients (SβC), and p-values for SβC. *p-value <0.01, **p-value <0.05. ND: Not detected. The tests between FRS-I and FRS-C scores with the rest of the variables were adjusted for sex, age, SBP, hypertension under treatment, smoking, alcohol consumption, and total cholesterol and HDL levels, as well as Type 2 Diabetes status. Own elaboration.

**Table 26. Associations between physical activity, dietary patterns and quality, intake of fried foods/fruits with anthropometric cardiovascular risk categories.**

|  | Estimator | WC-LR | WC-MR | WC-HR | WHtR-NR | WHtR-HR | WHtR-VHR | WHR-VL | WHR-LR | WHR-HR |
| --- | --- | --- | --- | --- | --- | --- | --- | --- | --- | --- |
| PA-Yes | R2  SβC | 0,717  0,793* | 0,717  0,100** | 0,717  -0,338** | 0,698  0,699* | 0,698  -0,298** | 0,698  -0,469* | 0,658  0,823* | 0,658  0,701* | 0,658  -0,450* |
| PA-No | R2  SβC | 0,717  0,050** | 0,717  0,438* | 0,717  0,820* | 0,698  0,020** | 0,698  0,820* | 0,698  0,972* | 0,658  0,100** | 0,658  0,417* | 0,658  0,895* |
| PA-3XW | R2  SβC | 0,717  0,799* | 0,717  0,126** | 0,717  -0,355** | 0,698  0,810* | 0,698  -0,523* | 0,698  -0,383** | 0,658  0,678* | 0,658  0,470* | 0,658  -0,426* |
| MOD-PA | R2  SβC | 0,717  0,863* | 0,717  0,123** | 0,717  -0,302** | 0,698  0,966* | 0,698  -0,635* | 0,698  -0,264** | 0,658  0,840* | 0,658  0,630* | 0,658  -0,351** |
| MIX-PA | R2  SβC | 0,717  0,646* | 0,717  0,114** | 0,717  -0,670* | 0,698  0,943* | 0,698  -0,533* | 0,698  -0,289** | 0,658  0,901* | 0,658  0,650* | 0,658  -0,425* |
| EX-RO | R2  SβC | 0,722  0,831* | 0,722  0,350** | 0,722  -0,359** | 0,716  0,843* | 0,716  0,101** | 0,716  -0,335** | 0,658  0,932* | 0,658  0,717* | 0,658  -0,416* |
| SED-HO | R2  SβC | 0,722  -0,657* | 0,722  0,228** | 0,722  0,460* | 0,644  -0,893* | 0,644  0,356** | 0,644  0,556* | 0,430  -0,900* | 0,430  -0,633* | 0,430  0,412* |
| DQ | R2  SβC | 0,923  -0,708* | 0,923  0,250** | 0,923  0,519* | 0,890  -0,936* | 0,890  0,427* | 0,890  0,570* | 0,723  -0,936* | 0,723  -0,750* | 0,723  0,560* |
| GOOD-DIET | R2  SβC | 0,923  0,863* | 0,923  0,250** | 0,923  -0,540* | 0,890  0,940* | 0,890  -0,250** | 0,890  -0,553* | 0,723  0,992* | 0,723  0,725* | 0,723  -0,561* |
| REGULAR-DIET | R2  SβC | 0,923  -0,400* | 0,923  0,389** | 0,923  0,877* | 0,890  -0,805* | 0,890  0,752* | 0,890  0,940* | 0,723  -0,936* | 0,723  -0,400* | 0,723  0,890* |
| POOR-DIET | R2  SβC | 0,923  -0,708* | 0,923  0,260** | 0,923  0,519* | 0,890  -0,630* | 0,890  0,620* | 0,890  0,876* | 0,723  -0,829* | 0,723  -0,720* | 0,723  0,728* |
| ATH-DIET | R2  SβC | 0,923  -0,749* | 0,923  0,390** | 0,923  0,519* | 0,890  -0,843* | 0,890  0,496* | 0,890  0,576* | 0,723  -0,923* | 0,723  -0,720* | 0,723  0,599* |
| MED-DIET | R2  SβC | 0,923  0,890* | 0,923  0,100** | 0,923  -0,540* | 0,890  0,958* | 0,890  -0,430* | 0,890  -0,553* | 0,723  0,910* | 0,723  0,200** | 0,723  -0,497* |
| WES-DIET | R2  SβC | 0,923  -0,875* | 0,923  0,447* | 0,923  0,652* | 0,890  -0,890* | 0,890  0,586* | 0,890  0,876* | 0,723  -0,966* | 0,723  -0,720* | 0,723  0,728* |
| FF | R2  SβC | 0,923  -0,635* | 0,923  0,250** | 0,923  0,528* | 0,716  -0,100** | 0,716  0,500* | 0,716  0,717* | 0,723  -0,833* | 0,723  -0,304** | 0,723  0,617* |
| FRUITS | R2  SβC | 0,923  0,928* | 0,923  -0,250** | 0,923  -0,654* | 0,716  0,958* | 0,716  -0,500* | 0,716  -0,660* | 0,723  0,890* | 0,723  -0,100** | 0,723  -0,729* |

WC: Waist Circumference. WHtR: Waist-to-Height Ratio. WHR: Waist-to-Hip Ratio. VL: Very Low Risk. LR: Low Risk. MR: Moderate Risk. HR: High Risk. VHR: Very High Risk. NR: No Cardiovascular Risk. PA: Physical activity. PA-3XW: Performs physical activity at least 3 times per week. MOD-PA: Performs moderate aerobic physical activity. MIX-PA: Performs moderate or mixed aerobic physical activity. EX-RO: Has an exercise routine. SED-HO: Sedentary hours per day. DQ: Dietary quality. GOOD-DIET: Good dietary quality. REGULAR-DIET: Regular dietary quality. POOR-DIET: Poor dietary quality. ATH-DIET: Atherogenic diet. MED-DIET: Mediterranean diet. WES-DIET: Western diet, FF: Fried foods. In MLR, the table reports the adjusted R² values, standardized β coefficients (SβC), and p-values for SβC. *p-value <0.01, **p-value <0.05. Own elaboration.

**Table 27. Associations between physical activity, dietary patterns and quality, intake of fried foods/fruits with CVR categories by FRS-I/FRS-C.**

|  | Estimator | FRS-I LR | FRS-I MR | FRS-I HR | FRS-I VHR | FRS-C LR | FRS-C MR | FRS-C HR | FRS-C VHR |
| --- | --- | --- | --- | --- | --- | --- | --- | --- | --- |
| PA-Yes | R2  SβC | 0,890  0,973* | 0,890  0,343** | 0,890  -0,298** | 0,890  -0,360** | 0,890  0,973* | 0,890  0,343** | 0,890  -0,298** | 0,890  -0,360** |
| PA-No | R2  SβC | 0,890  0,090** | 0,890  0,348** | 0,890  0,678* | 0,890  0,765* | 0,890  0,090** | 0,890  0,348** | 0,890  0,678* | 0,890  0,765* |
| PA-3XW | R2  SβC | 0,890  0,996* | 0,890  0,426* | 0,890  -0,350** | 0,890  -0,487* | 0,890  0,996* | 0,890  0,426* | 0,890  -0,350** | 0,890  -0,487** |
| MOD-PA | R2  SβC | 0,890  0,896* | 0,890  0,327** | 0,890  -0,452* | 0,890  -0,533* | 0,890  0,896* | 0,890  0,327** | 0,890  -0,452* | 0,890  -0,533* |
| MIX-PA | R2  SβC | 0,890  0,717* | 0,890  0,426* | 0,890  -0,538* | 0,890  -0,896* | 0,890  0,717* | 0,890  0,426* | 0,890  -0,538* | 0,890  -0,896* |
| EX-RO | R2  SβC | 0,890  0,670* | 0,890  0,415* | 0,890  -0,498* | 0,890  -0,726* | 0,890  0,670* | 0,890  0,415* | 0,890  -0,498* | 0,890  -0,726* |
| SED-HO | R2  SβC | 0,728  0,150** | 0,728  0,623* | 0,728  0,817* | 0,728  0,901* | 0,728  0,150** | 0,728  0,623* | 0,728  0,817* | 0,728  0,901* |
| DQ | R2  SβC | 0,933  0,972* | 0,933  -0,355** | 0,933  -0,497* | 0,933  -0,622* | 0,933  0,972* | 0,933  -0,355* | 0,933  -0,497* | 0,933  -0,622* |
| GOOD-DIET | R2  SβC | 0,933  -0,327** | 0,933  0,320** | 0,933  0,677* | 0,933  0,823* | 0,933  -0,327** | 0,933  0,320** | 0,933  0,676* | 0,933  0,823* |
| REGULAR-DIET | R2  SβC | 0,933  -0,998* | 0,933  0,100** | 0,933  0,560* | 0,933  0,832* | 0,933  -0,998* | 0,933  0,100** | 0,933  0,560* | 0,933  0,832* |
| POOR-DIET | R2  SβC | 0,933  -0,895* | 0,933  0,250** | 0,933  0,623* | 0,933  0,845* | 0,933  -0,895* | 0,933  0,250** | 0,933  0,623* | 0,933  0,845* |
| ATH-DIET | R2  SβC | 0,933  0,570* | 0,933  -0,123** | 0,933  -0,300** | 0,933  -0,657* | 0,933  0,570* | 0,933  -0,123** | 0,933  -0,300** | 0,933  -0,657* |
| MED-DIET | R2  SβC | 0,933  -0,728* | 0,933  0,430* | 0,933  0,522* | 0,933  0,720* | 0,933  -0,728* | 0,933  0,430* | 0,933  0,522* | 0,933  0,720* |
| WES-DIET | R2  SβC | 0,820  0,070** | 0,820  0,468* | 0,820  0,768* | 0,820  0,924* | 0,820  0,070** | 0,820  0,468* | 0,820  0,768* | 0,820  0,924* |
| FF | R2  CβE | 0,820  0,070** | 0,820  0,468* | 0,820  0,768* | 0,820  0,924* | 0,820  0,070** | 0,820  0,468* | 0,820  0,768* | 0,820  0,924* |
| FRUITS | R2  CβE | 0,820  0,410* | 0,820  0,120** | 0,820  -0,280** | 0,820  -0,550* | 0,820  0,410* | 0,820  0,120** | 0,820  -0,280** | 0,820  -0,550* |

PA: Physical activity, PA-3XW: Performs physical activity at least 3 times per week, MOD-PA: Performs moderate aerobic physical activity, MIX-PA: Performs moderate or mixed aerobic physical activity, EX-RO: Has an exercise routine, SED-HO: Sedentary hours per day, DQ: Diet Quality, GOOD-DIET: Good dietary quality, REGULAR-DIET: Regular dietary quality, POOR-DIET: Poor dietary quality, ATH-DIET: Atherogenic diet. MED-DIET: Mediterranean diet. WES-DIET: Western diet, FF: Fried foods, FRS-I: Framingham Risk Score - International, 10-years forecasted. FRS-C: Framingham Risk Score - Colombia, 10-years forecasted. LR: Low Risk. MR: Moderate Risk. HR: High Risk. VHR: Very High Risk. In MLR, the table reports the adjusted R² values, standardized β coefficients (SβC), and p-values for SβC. *p-value <0.01, **p-value <0.05. The tests between FRS-I and FRS-C scores with the rest of the variables were adjusted for sex, age, SBP, hypertension under treatment, smoking, alcohol consumption, and total cholesterol and HDL levels, as well as Type 2 Diabetes status. Own elaboration.

**Table 28. Associations between blood biochemistry with physical activity (PA).**

|  | Estimator | PA-Yes | PA-No | EX-RO | PA-3XW | MOD-PA | MIX-PA | SED-HO | IRREG-PA |
| --- | --- | --- | --- | --- | --- | --- | --- | --- | --- |
| SBP | R2  SβC | 0,920  -0,766* | 0,920  0,623 | 0,920  -0,280** | 0,920  -0,717* | 0,920  -0,652* | 0,920  -0,723* | 0,827  0,899* | 0,925  0,360** |
| DBP | R2  SβC | 0,820  -0,400* | 0,820  0,423 | 0,820  -0,207** | 0,820  -0,508* | 0,820  -0,433* | 0,820  -0,526* | 0,715  0,719* | 0,632  0,280** |
| Glycaemia | R2  SβC | 0,626  -0,718* | 0,626  0,566* | 0,626  -0,237** | 0,626  -0,726* | 0,626  -0,639* | 0,626  -0,730* | 0,524  0,727* | 0,715  0,572* |
| Insulin | R2  SβC | 0,798  -0,802* | 0,798  0,673* | 0,798  -0,303** | 0,798  -0,816* | 0,798  -0,723* | 0,798  -0,803* | 0,638  0,522* | 0,715  0,614* |
| HOMA-IR | R2  SβC | 0,804  -0,890* | 0,804  0,749* | 0,804  -0,427* | 0,804  -0,885* | 0,804  -0,638* | 0,804  -0,872* | 0,716  0,799* | 0,715  0,650* |
| Adiponectin | R2  SβC | 0,917  0,726* | 0,917  -0,823* | 0,917  -0,527* | 0,917  0,793* | 0,917  0,429* | 0,917  0,672* | 0,720  -0,877* | 0,820  0,107** |
| TC | R2  SβC | 0,939  -0,763* | 0,939  0,956* | 0,939  -0,490* | 0,930  -0,750* | 0,930  -0,722* | 0,930  -0,715* | 0,824  0,890* | 0,720  0,600* |
| TG | R2  SβC | 0,840  -0,899* | 0,840  0,893* | 0,840  -0,508* | 0,840  -0,890* | 0,840  -0,623* | 0,840  -0,610* | 0,720  0,744* | 0,733  0,563* |
| HDL | R2  SβC | 0,716  0,523* | 0,716  -0,326** | 0,716  0,318** | 0,716  0,519* | 0,716  0,500* | 0,716  0,639* | 0,615  -0,326** | 0,718  0,100** |
| LDL | R2  SβC | 0,825  -0,978* | 0,825  0,783* | 0,825  -0,462* | 0,825  -0,864* | 0,825  -0,610* | 0,825  -0,723* | 0,710  0,788* | 0,793  0,418* |
| VLDL | R2  SβC | 0,840  -0,893* | 0,840  0,894* | 0,840  -0,453* | 0,840  -0,798* | 0,840  -0,670* | 0,840  -0,610* | 0,720  0,803* | 0,740  0,327** |
| TG/HC | R2  SβC | 0,616  -0,900* | 0,616  0,907* | 0,616  -0,728* | 0,616  -0,869* | 0,616  -0,693* | 0,616  -0,663* | 0,438  0,503* | 0,622  0,495* |
| HC/TG | R2  SβC | 0,420  -0,324** | 0,420  0,463* | 0,420  -0,294** | 0,420  -0,381** | 0,420  -0,296** | 0,420  -0,290** | ND | 0,428  -0,279** |

SBP: Systolic blood pressure. DBP: Diastolic blood pressure. TC: Total cholesterol. TG: Triglycerides. HC: Hip Circumference, PA-Yes: Practice physical activity. PA-No: Do not practice physical activity, PA-3XW: Practice physical activity at least 3 times per week. MOD-PA: Engages in moderate aerobic physical activity. MIX-PA: Engages in moderate or mixed aerobic physical activity. EX-RO: Has an exercise routine. SED-HO: Sedentary hours per day. IRREG-PA: Engages in irregular or sporadic physical activity. In MLR, the table reports the adjusted R² values, standardized β coefficients (SβC), and p-values for SβC. *p-value <0.01, **p-value <0.05. ND: Not detected. Own elaboration.

**Table 29. Associations between dietary quality and patterns with food groups and consumption of fried foods and fruits.**

|  | DQ | ATH-DIET | WES-DIET | MED-DIET | G1 | G2 | G3 | G4 | G5 | G6 | G7 | FF | FRUITS |
| --- | --- | --- | --- | --- | --- | --- | --- | --- | --- | --- | --- | --- | --- |
| GOOD-DIET | 0,997* | 0,010** | 0,012** | 0,995* | 0,930* | 0,996* | 0,763* | 0,432* | 0,100** | 0,080** | 0,150** | 0,150** | 0,937* |
| REGULAR-DIET | 0,998* | 0,598* | 0,663* | 0,120** | 0,256** | 0,178** | 0,329** | 0,527* | 0,624* | 0,602* | 0,798* | 0,460* | 0,260** |
| POOR-DIET | 0,999* | 0,927* | 0,893* | 0,100** | 0,050** | 0,050** | 0,632* | 0,633* | 0,988* | 0,990* | 0,801* | 0,726* | 0,010** |
| ATH-DIET | 0,999* | 1,00* | 0,854* | 0,100** | 0,147** | 0,162** | 0,426* | 0,673* | 0,967* | 0,968* | 0,973* | 0,715* | 0,050** |
| WES-DIET | 0,998* | 0,854* | 1,00* | 0,408* | 0,218** | 0,100** | 0,621* | 0,602* | 0,722* | 0,940* | 0,876* | 0,524* | 0,100** |
| MED-DIET | 0,997* | 0,100** | 0,408* | 1,00* | 0,829* | 0,532* | 0,414* | 0,178** | 0,185** | 0,307** | 0,170** | 0,016** | 0,787* |
| G1 | 0,830* | 0,147** | 0,218** | 0,401* | 1,00* | 1,00* | 0,283** | 0,205** | 0,157** | 0,262** | 0,201** | 0,080** | 0,988* |
| G2 | 0,627* | 0,162** | 0,100** | 0,532* | 1,00* | 1,00* | 0,563* | 0,407* | 0,381** | 0,427* | 0,717* | 0,822* | 0,825* |
| G3 | 0,870* | 0,426* | 0,621* | 0,414* | 0,283** | 0,563* | 1,00* | 0,529* | 0,640* | 0,788* | 0,901* | 0,763* | 0,170** |
| G4 | 0,728* | 0,673* | 0,602* | 0,178** | 0,205** | 0,407* | 0,529* | 1,00* | 0,340** | 0,890* | 0,400* | 0,387** | 0,170** |
| G5 | 0,990* | 0,967* | 0,722* | 0,185** | 0,157** | 0,381** | 0,640* | 0,340** | 1,00* | 0,866* | 0,856* | 0,752* | 0,100** |
| G6 | 0,999* | 0,968* | 0,940* | 0,307** | 0,262** | 0,427* | 0,788* | 0,890* | 0,866* | 1,00* | 0,695* | 0,838* | 0,785* |
| G7 | 0,820* | 0,973* | 0,876* | 0,170** | 0,201** | 0,717* | 0,901* | 0,400* | 0,856* | 0,695* | 1,00* | 0,910* | 0,395** |
| FF | 0,923* | 0,715* | 0,524* | 0,016** | 0,080** | 0,822* | 0,763* | 0,387** | 0,752* | 0,838* | 0,910* | 1,00* | 0,115** |
| FRUITS | 0,821* | 0,050* | 0,100** | 0,787* | 0,988* | 0,825* | 0,170** | 0,170** | 0,100** | 0,785* | 0,395** | 0,115** | 1,00* |

DQ: Diet quality, GOOD-DIET: Good dietary quality, REGULAR-DIET: Regular dietary quality, POOR-DIET: Poor dietary quality, ATH-DIET: Atherogenic diet, WES-DIET: Western diet, MED-DIET: Mediterranean diet. FF: Weekly or daily consumption of fried foods, FRUITS: Weekly or daily consumption of fruits. G: Food groups, G1: Cereals, Vegetables, and Legumes. G2: Meat, Poultry, Eggs, Fish, and Seafood. G3: Milk and Dairy Products. G4: Vegetable Oil, Butter, and Margarine. G5: Refined Sugars and Sweets. G6: Processed Meat Products. G7: Cured Meat and Sausages. The chi-square test of independence was used, and the effect size was reported using Crammer’s V. A single superscript asterisk (*) indicates a p-value < 0.01, while a double asterisk (**) indicates a p-value < 0.05. Own elaboration.

**Table 30. Associations between blood biochemistry with dietary patterns and quality, food groups, and intake of fried foods and fruits.**

|  | Est. | GOOD-DIET | REG-DIET | POOR-DIET | ATH-DIET | WES-DIET | MED-DIET | G1 | G2 | G3 | G4 | G5 | G6 | G7 | FF | FRUITS |
| --- | --- | --- | --- | --- | --- | --- | --- | --- | --- | --- | --- | --- | --- | --- | --- | --- |
| Glycaemia | R2  SβC | 0,677  -0,469* | 0,677  0,272* | 0,677  0,695* | 0,677  0,491* | 0,677  0,516* | 0,677  -0,560* | 0,781  -0,478* | 0,701  -0,450* | 0,717  0,517* | 0,610  0,470* | 0,805  0,610* | 0,879  0,918* | 0,511  0,617* | 0,726  0,718* | 0,625  -0,306** |
| Insulin | R2  SβC | 0,680  -0,724* | 0,680  0,432* | 0,680  0,763* | 0,680  0,718* | 0,680  0,720* | 0,680  -0,582* | 0,781  -0,516* | 0,701  -0,417* | 0,717  0,495* | 0,610  0,470* | 0,805  0,631* | 0,879  0,970* | 0,511  0,637* | 0,726  0,858* | 0,625  -0,357** |
| HOMA-IR | R2  SβC | 0,656  -0,680* | 0,656  0,400* | 0,656  0,821* | 0,656  0,722* | 0,656  0,735* | 0,656  -0,677* | 0,781  -0,544* | 0,701  -0,422* | 0,717  0,625* | 0,610  0,523* | 0,805  0,702* | 0,879  0,956* | 0,511  0,640* | 0,726  0,763* | 0,625  -0,289** |
| Adiponectin | R2  SβC | 0,717  0,648* | 0,717  0,232** | 0,717  -0,769* | 0,717  -0,331** | 0,717  -0,758* | 0,717  0,619* | 0,714  0,378** | 0,720  0,502* | 0,723  -0,397* | 0,599  0,429* | 0,890  -0,591* | 0,923  -0,638* | 0,493  0,125** | 0,700  -0,425* | 0,620  0,187** |
| TC | R2  SβC | 0,622  -0,718* | 0,622  0,427* | 0,622  0,716* | 0,622  0,789* | 0,622  0,803* | 0,622  -0,726* | 0,608  -0,627* | 0,601  -0,626* | 0,839  0,846* | 0,637  0,682* | 0,725  0,765* | 0,800  0,821* | 0,560  0,621* | 0,630  0,526* | 0,420  -0,200** |
| TG | R2  SβC | 0,622  -0,918* | 0,622  0,424* | 0,622  0,762* | 0,622  0,816* | 0,622  0,890* | 0,622  -0,808* | 0,608  -0,428* | 0,601  -0,438* | 0,839  0,794* | 0,637  0,515* | 0,725  0,761* | 0,800  0,819* | 0,560  0,618* | 0,630  0,570* | 0,420  -0,205** |
| HDL | R2  SβC | 0,778  0,800* | 0,778  0,100** | 0,778  -0,880* | 0,778  -0,798* | 0,778  -0,890* | 0,778  -0,827* | 0,567  0,100** | 0,560  0,566* | 0,839  0,863* | 0,623  0,236** | 0,703  0,402* | 0,511  -0,530* | 0,627  0,450* | 0,630  -0,657* | 0,420  0,059** |
| LDL | R2  SβC | 0,700  -0,563* | 0,700  0,274** | 0,700  0,788* | 0,700  0,826* | 0,700  0,839* | 0,700  -0,623* | 0,450  -0,189** | 0,507  -0,200** | 0,718  0,789* | 0,620  0,417* | 0,717  0,768* | 0,626  0,640* | 0,560  0,623* | 0,716  0,787* | 0,420  -0,200** |
| VLDL | R2  SβC | 0,620  -0,909* | 0,620  0,308** | 0,620  0,796* | 0,620  0,815* | 0,620  0,899* | 0,620  -0,811* | 0,608  -0,501* | 0,601  -0,438* | 0,839  0,820* | 0,637  0,560* | 0,725  0,750* | 0,800  0,840* | 0,560  0,670* | 0,630  0,575* | 0,420  -0,206** |
| TC/HDL | R2  SβC | 0,622  -0,700* | 0,622  0,420* | 0,622  0,870* | 0,622  0,856* | 0,622  0,825* | 0,622  -0,683* | 0,617  -0,729* | 0,604  -0,619* | 0,840  0,895* | 0,640  0,698* | 0,720  0,860* | 0,805  0,833* | 0,560  0,647* | 0,630  0,599* | 0,536  -0,237** |
| TG/HDL | R2  SβC | 0,646  -0,920* | 0,646  0,422* | 0,646  0,768* | 0,646  0,832* | 0,646  0,890* | 0,646  -0,825* | 0,608  -0,619* | 0,600  -0,631* | 0,827  0,698* | 0,635  0,510* | 0,725  0,768* | 0,814  0,829* | 0,560  0,625* | 0,630  0,577* | 0,523  -0,206** |
| LDL/HDL | R2  SβC | 0,806  -0,432* | 0,806  0,100** | 0,806  0,625* | 0,806  0,636* | 0,806  0,850* | 0,806  -0,448* | 0,620  -0,634* | 0,605  -0,649* | 0,723  0,784* | 0,515  0,565* | 0,728  0,768* | 0,670  0,677* | 0,616  0,628* | 0,701  0,722* | 0,518  -0,210** |
| TC-HDL | R2  SβC | 0,650  -0,736* | 0,650  0,566* | 0,650  0,863* | 0,650  0,815* | 0,650  0,833* | 0,650  -0,755* | 0,620  -0,648* | 0,617  -0,640* | 0,730  0,785* | 0,650  0,699* | 0,730  0,770* | 0,800  0,827* | 0,577  0,620* | 0,630  0,533* | 0,420  -0,220** |
| (TC-HDL)/HDL | R2  SβC | 0,677  -0,740* | 0,677  0,400* | 0,677  0,790* | 0,677  0,822* | 0,677  0,872* | 0,677  -0,760* | 0,600  -0,615* | 0,510  -0,598* | 0,610  0,698* | 0,516  0,570* | 0,640  0,672* | 0,827  0,890* | 0,589  0,640* | 0,647  0,698* | 0,422  -0,198** |
| TG/HC | R2  SβC | 0,610  -0,996* | 0,610  0,500* | 0,610  0,861* | 0,610  0,972* | 0,610  0,997* | 0,610  -0,769* | 0,615  -0,678* | 0,601  -0,672* | 0,840  0,899* | 0,644  0,562* | 0,730  0,777* | 0,800  0,820* | 0,566  0,620* | 0,630  0,561* | 0,420  -0,199** |

Est: Estimator, GOOD-DIET: Good dietary quality, REG-DIET: Regular dietary quality, POOR-DIET: Poor dietary quality, ATH-DIET: Atherogenic diet, WES-DIET: Western diet, MED-DIET: Mediterranean diet, FF: Weekly or daily consumption of fried foods, FRUITS: Weekly or daily consumption of fruits, TC: Total cholesterol, TG: Triglycerides, HC: Hip Circumference, G: Food groups, G1: Fruits, Vegetables, and Legumes, G2: Whole Grains and Legumes, G3: Meat, Poultry, Eggs, Fish, and Seafood, G4: Milk and Dairy Products, G5: Vegetable Oil, Butter, and Margarine, G6: Refined Sugars and Sweets, G7: Processed Meat Products. In MLR, the table reports the adjusted R² values, standardized β coefficients (SβC), and p-values for SβC. *p-value <0.01, **p-value <0.05. Own elaboration.
